1 Modeling the Orthosteric Binding Site of the G Protein-Coupled  
2 Odorant Receptor OR5K1

3 *Alessandro Nicoli,<sup>1‡</sup> Franziska Haag,<sup>1‡</sup> Patrick Marcinek,<sup>1</sup> Ruiming He,<sup>1,2</sup> Johanna Kreißl,<sup>1</sup>*  
4 *Jörg Stein,<sup>1</sup> Alessandro Marchetto,<sup>3,4</sup> Andreas Dunkel,<sup>1</sup> Thomas Hofmann,<sup>5</sup> Dietmar*  
5 *Krautwurst,<sup>1\*</sup> Antonella Di Pizio<sup>1\*</sup>*

6 <sup>1</sup> Leibniz Institute for Food Systems Biology at the Technical University of Munich, 85354  
7 Freising, Germany

8 <sup>2</sup> Department of Chemistry, Technical University of Munich, D-85748 Garching, Germany

9 <sup>3</sup> Institute for Advanced Simulations (IAS)-5/Institute for Neuroscience and Medicine (INM)-  
10 9, Forschungszentrum Jülich, 52428 Jülich, Germany

11 <sup>4</sup> Faculty of Mathematics, Computer Science and Natural Sciences, RWTH Aachen University,  
12 52062 Aachen, Germany

13 <sup>5</sup> Chair of Food Chemistry and Molecular Sensory Science, Technical University of Munich,  
14 85354 Freising, Germany

15

16

17

18 **ABSTRACT:** With approximately 400 encoding genes in humans, odorant receptors (ORs) are  
19 the largest subfamily of class A G protein-coupled receptors (GPCRs). Despite its high  
20 relevance and representation, the odorant-GPCRome is structurally poorly characterized: no  
21 experimental structures are available and the low sequence identity of ORs to experimentally  
22 solved GPCRs is a major challenge for their modeling. Moreover, the receptive range of most  
23 ORs is unknown. The odorant receptor OR5K1 was recently and comprehensively  
24 characterized in terms of cognate agonists. Here we investigate the binding modes of identified  
25 ligands into the OR5K1 orthosteric binding site using structural information both from AI-  
26 driven modeling, as recently released in the AlphaFold Protein Structure Database, and from  
27 template-based modeling. Induced-fit docking simulations were used to sample the binding site  
28 conformational space for ensemble docking. Side chain residue sampling and model selection  
29 were guided by mutagenesis data. We obtained models that could better rationalize the different  
30 activity of active (agonist) versus inactive molecules with respect to starting models, and also  
31 capture differences in activity related to small structural differences. We, therefore, provide a  
32 model refinement protocol that can be applied to model the orthosteric binding site of ORs as  
33 well as that of GPCRs with low sequence identity to available templates.

34

35

## 36 INTRODUCTION

37 G protein-coupled receptors (GPCRs) are the largest family of membrane proteins in the human  
38 genome. Through interaction with their modulators, GPCRs mediate the communication  
39 between the cell and the extracellular environment and are therefore involved in almost all  
40 physiological functions.<sup>1-4</sup> Commonly, GPCRs are grouped into six classes based on the  
41 phylogenetic analysis: A (rhodopsin-like), B (secretin-like), C (metabotropic glutamate  
42 receptors), D (pheromone receptors), E (cAMP receptors), and F (frizzled/smoothened  
43 receptors).<sup>5-6</sup> Class A GPCRs consist of over 80% of all GPCRs and are the targets of 34% of  
44 all drugs present in the market.<sup>7-8</sup>

45 Class A GPCRs share a basic architecture consisting of a bundle of seven transmembrane  $\alpha$ -  
46 helices (TM1-TM7) connected by three intracellular loops (ICLs) and three extracellular loops  
47 (ECLs), a relatively short N-terminus in the extracellular region, and a short helix 8 connected  
48 to the C-terminus in the intracellular module. The ligand-binding domain of class A GPCRs,  
49 commonly referred to as the orthosteric binding site, is located in the EC part of the 7TM bundle  
50 (made up of residues belonging to TM3, TM5, TM6, and TM7), and has high structural  
51 diversity among different receptor subtypes. The 7TM bundle is the most structurally conserved  
52 component of the class A GPCR structures, presenting characteristic hydrophobic patterns and  
53 functionally important signature motifs.<sup>9-10</sup>

54 Odorant receptors (ORs), with approximately 400 encoding genes in humans, are the largest  
55 subfamily of class A GPCRs.<sup>11-15</sup> Mammalian odorant receptors are split into two  
56 phylogenetically distinct groups, class I and class II ORs, which can be distinguished by some  
57 characteristic features that are highly conserved within their sequences.<sup>16-19</sup> ORs present most  
58 of the class A GPCR signature motifs, despite an overall low sequence identity with the non-  
59 sensory class A GPCRs.<sup>20-21</sup> The orthosteric binding site of ORs was also found to coincide  
60 with that of non-sensory class A GPCRs.<sup>20-25</sup>

61 The olfactory system uses a combinatorial code of ORs to represent thousands of odorants: a  
62 specific OR type may recognize more than one odorant, and each odorant may be recognized  
63 by more than one OR.<sup>26-31</sup> Despite current efforts in assigning ORs to odorant molecules, or,  
64 vice versa, in defining the chemical ligand space of individual ORs, only the molecular  
65 recognition ranges of a few ORs have been investigated.<sup>27, 32-37</sup>

66 Structure-based virtual screening campaigns have been successfully applied for GPCR ligand  
67 discovery and are always more in use with the recent extraordinary advances in GPCR structural  
68 biology.<sup>38</sup> Currently, no experimental structures of human ORs are available, and homology  
69 modeling techniques have been used to rationalize the binding modes of odorant compounds  
70 into ORs and discover new OR ligands.<sup>37, 39-43</sup> AI-based methods are emerging as compelling  
71 tools to predict the 3D structure of proteins.<sup>44-46</sup> During the CASP (Critical Assessment of  
72 Structure Prediction) 14 competition, AlphaFold 2 (AF2) was shown to be able to predict the  
73 structure of protein domains at an accuracy matching experimental methods.<sup>47</sup> A database of  
74 over 360,000 protein models across 21 species was released and is scheduled to grow to cover  
75 over 100 million proteins (<https://alphafold.ebi.ac.uk/>).<sup>48-49</sup> The database expands the coverage  
76 for GPCR structures, including 4,192 proteins annotated as odorant receptors, 97% of which  
77 are mammalian.<sup>45</sup>

78 In this paper, we used both AlphaFold 2 and template-based modeling methodologies for  
79 OR5K1 structural prediction. OR5K1 has been recently characterized as the specialized OR for  
80 the detection of pyrazine-based key food odorants and semiochemicals.<sup>50</sup> We investigated the  
81 interaction of the set of identified agonists within the binding site of OR5K1 and used ligand  
82 information and mutagenesis data to guide the model refinement process.

83

84

85

## 86 RESULTS AND DISCUSSION

87 **OR5K1 agonists.** Pyrazines are known for contributing greatly to the aroma of roasted foods,<sup>51-</sup>  
88 <sup>53</sup> but they are also renowned as semiochemicals,<sup>54-58</sup> namely compounds that transfer chemical  
89 cues between individuals of the same and/or different species, most often eliciting a  
90 standardized behavior.<sup>59</sup> Recently, OR5K1 was characterized as a specialized odorant receptor  
91 for the detection of pyrazine-based key food odorants and semiochemicals.<sup>50</sup> The most potent  
92 compound is compound **1** (2,3-diethyl-5-methylpyrazine, EC<sub>50</sub> = 10.29 μM). Compounds tested  
93 against OR5K1 include molecules with shorter or missing aliphatic chains to the pyrazine  
94 moiety (compounds **4**, **6**, **7**, **12**). We also know that the pyrazine itself does not activate this  
95 receptor.<sup>50</sup> Therefore, the activity of OR5K1 molecules is supposed to rely on the presence and  
96 position of the aliphatic chains (Table 1). Interestingly, in the screening of pyrazines, the  
97 mixture of isomers 2-ethyl-3,5(6)-dimethylpyrazine was found to activate OR5K1 with an EC<sub>50</sub>  
98 of 21.18 μM.<sup>50</sup> In this work, we isolated the mixture and tested the individual isomers against  
99 OR5K1. We found that 2-ethyl-3,6-dimethylpyrazine (compound **2**) has an EC<sub>50</sub> of 14.85 μM,  
100 while 2-ethyl-3,5-dimethylpyrazine (compound **13**) could not be measured to saturation with  
101 the concentration range available. This provides precise information on the contribution of the  
102 ethyl groups attached to the pyrazine ring.

103

104 **Table 1.** OR5K1 agonists and EC<sub>50</sub> values. Data for compounds **1**, **3-12** are retrieved from literature,<sup>50</sup> while data  
105 for compounds **2** and **13** were tested in this work.

106

| Compound | Name                         | Structure                                                                           | CAS        | EC <sub>50</sub> (μM) |
|----------|------------------------------|-------------------------------------------------------------------------------------|------------|-----------------------|
| <b>1</b> | 2,3-Diethyl-5-methylpyrazine | 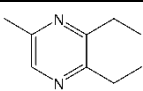 | 18138-04-0 | 10.29 ± 1.06          |

|    |                               |                                                                                     |            |                 |
|----|-------------------------------|-------------------------------------------------------------------------------------|------------|-----------------|
| 2  | 2-Ethyl-3,6-dimethylpyrazine  | 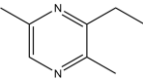   | 13360-65-1 | 14.85 ± 6.69    |
| 3  | Methyl eugenol                |    | 93-15-2    | 62.21 ± 1.45    |
| 4  | 2,3-Diethylpyrazine           |    | 15707-24-1 | 94.36 ± 11.90   |
| 5  | 2-Ethyl-3-methoxypyrazine     |    | 25680-58-4 | 97.4 ± 15.59    |
| 6  | 2,3,5-Trimethylpyrazine       |    | 14667-55-1 | 139.04 ± 7.08   |
| 7  | 2-Ethyl-3-methylpyrazine      |    | 15707-23-0 | 537.87 ± 96.79  |
| 8  | 2-Isobutyl-3-methoxypyrazine  |   | 24683-00-9 | 177.94 ± 24.89  |
| 9  | 2-Isopropyl-3-methoxypyrazine |  | 25773-40-4 | 145.63 ± 8.83   |
| 10 | 2-Acetyl-3-ethylpyrazine      |  | 32974-92-8 | 527.76 ± 167.17 |
| 11 | 2-Acetyl-3-methylpyrazine     |  | 23787-80-6 | 531.22 ± 27.59  |
| 12 | 2,6-Dimethylpyrazine          |  | 108-50-9   | 543.92 ± 19.50  |
| 13 | 2-Ethyl-3,5-dimethylpyrazine  |  | 13925-07-0 | ≥ 300*          |

107 \* The last concentration that has been experimentally investigated is 300 μM. Concentration-response  
 108 curves are shown in Figure 4.

109

110

111 **OR5K1 structure prediction.** ORs and chemosensory GPCRs share low sequence similarity  
112 (below 20%) with experimentally solved GPCRs.<sup>20, 60</sup> The accuracy of 3D structures obtained  
113 by homology modeling is highly dependent on the templates. Good models of membrane  
114 proteins can be obtained for template sequence identities higher than 30%.<sup>61</sup> A multi-template  
115 homology modeling approach has been used for successfully modeling different ORs, including  
116 OR51E1 and OR7D4.<sup>23, 62</sup> In this approach, conserved motifs were used to guide the sequence  
117 alignment of odorant receptors; bovine Rhodopsin (bRho), human  $\beta$ 2-adrenergic (h $\beta$ 2AR),  
118 human Adenosine-2A (hA2A), and human Chemokine-4 (hCXCR4) receptors were used as  
119 templates.<sup>21</sup>

120 OR5K1 shares 15-19% sequence identity with these templates (Figure S1). Considering that we  
121 aimed to use the model to investigate the binding modes of agonists, we built the 3D structure  
122 of OR5K1 using bRho, h $\beta$ 2AR, and hA2A in their active state, while hCXCR4 is only available  
123 in its inactive state.<sup>38</sup> The extracellular loop 2 (ECL2) of the templates is much shorter than the  
124 ECL2 of OR5K1 (Figure S2). ECL2 is the largest and most structurally diverse extracellular  
125 loop of GPCRs,<sup>63</sup> and those of ORs are among the longest ECL2 in class A GPCR.<sup>64</sup> Loop  
126 modeling is highly challenging when sequence length reaches the size of the ECL2.<sup>65-67</sup> We  
127 remodeled this region using templates with higher similarities in terms of length and sequence  
128 composition (Figures S2 and S3). Specifically, we used the ECL2 of NPY2 and CCK1 receptors  
129 as templates for the segment before the conserved Cys<sup>45,50</sup> (S157<sup>4,57</sup> - Y179<sup>ECL2</sup>) and the Apelin  
130 receptor for the segment after the Cys<sup>45,50</sup> (C180<sup>45,50</sup> - L188<sup>5,37</sup>).

131 We then downloaded the Alphafold 2 (AF2) structure of OR5K1  
132 (<https://alphafold.ebi.ac.uk/entry/Q8NHB7>) to compare it with our homology model (HM).  
133 Except for the N-Terminus and the ECL3, the per-residue confidence score (average predicted  
134 local distance difference test, pLDDT) of all regions of the model is >90 (very high) or between  
135 70 and 90 (confident) (Figure S3). The OR5K1 AF2 model is also among the high confidence

136 AF2 GPCR models, as assessed by the per-model pLDDT<sub>80</sub> score, which was suggested as a  
137 potential criterion to assess the quality of AF2 models for structure-based virtual screening.<sup>68</sup>  
138 AF2 and HM models have a Root Mean Square Deviation (RMSD) of the alpha carbons of 3.26  
139 Å. We observed a major difference in the TM5 conformation, which is closer to the orthosteric  
140 binding site in the HM than in the AF2 model. We calculated the GPCR activation index of the  
141 two models using the A100 tool,<sup>69</sup> confirming that the HM is in its active state with an activation  
142 index of 68.46, but AF2 is an inactive model with an activation index of -21.30. This is because  
143 the OR5K1 HM was modeled using most of the templates in the active state conformation,  
144 instead, AF2 was generated with algorithms that do not necessarily take into consideration the  
145 activity state.

146 To assess the predictive ability of the HM and AF2 models, we performed molecular docking  
147 calculations of known ligands as actives (13 compounds, Table 1) and with all the compounds  
148 that did not elicit receptor response with a defined chirality (131 compounds, the complete list  
149 with SMILES is available at [https://github.com/dipizio/OR5K1\\_binding\\_site](https://github.com/dipizio/OR5K1_binding_site)) as inactives, and  
150 we then evaluated the performance of each model through Receiver Operating Characteristic  
151 (ROC) analysis.<sup>70-71</sup> The Area Under the Curve (AUC) values are similar for HM (0.67) and  
152 AF2 (0.68), and the enrichment factor in the top 15% of the sorted screened molecules (EF<sub>15%</sub>)  
153 is very low in both cases, 0.11 and 0.24 for HM and AF2, respectively (EF<sub>15% max</sub> = 1.63) (Figure  
154 S4). The AF2 model is not able to dock the most potent agonists in our set. The only highly  
155 ranked agonist in both HM and AF2 models is compound **9** (EC<sub>50</sub> = 527.76 µM), with docking  
156 scores of -5.68 and -4.91 kcal/mol, respectively. As expected, HM and AF2 models have  
157 different residue arrangements in the binding site, but, surprisingly, also the location of the  
158 predicted binding pocket is different (Figure 1). The orthosteric binding site of AF2 is not  
159 accessible, the pocket calculated with Sitemap (Schrödinger Release 2021-3: SiteMap,  
160 Schrödinger, LLC, New York, NY, 2021)<sup>72-73</sup> is located between TM5 and TM6 and extends  
161 towards the membrane bilayer (Figure 1). Indeed, the location of the orthosteric binding site is



162 partially occluded by the ECL2. The ECL2 folding is the most evident difference between the  
163 two models: we modeled the HM as an anti-parallel  $\beta$ -sheet, instead AF2 carries out an  
164 unstructured loop with a small  $\alpha$ -helix that enters the orthosteric binding site.

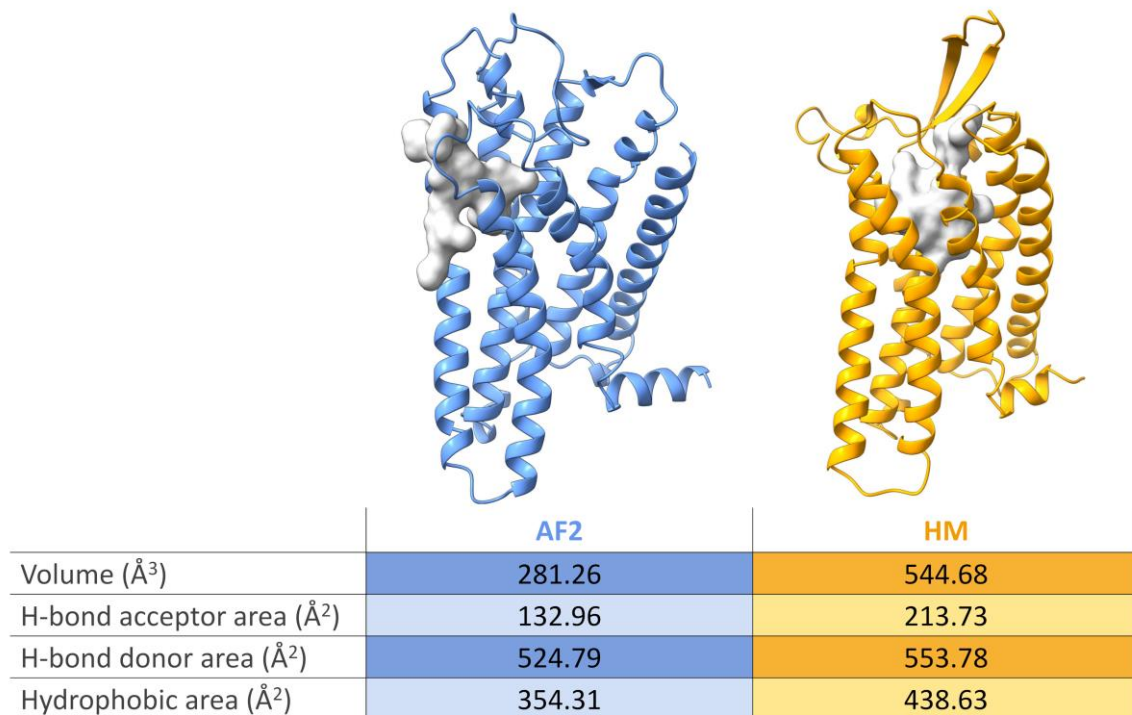

165  
166 **Figure 1. OR5K1 starting models from AF2 (in blue) and HM (in orange).** SiteMap volume, H-bond acceptor  
167 area, H-bond donor area, and hydrophobic area are reported for both models.

168  
169 Moreover, the secondary structure of the terminal region of TM6 is not well defined in the AF2,  
170 this portion is classified with local prediction confidence pLDDT between 70 and 90 for the  
171 helix part and lower than 70 for the ECL3 part (Figure S3). The initial part of TM7 is also  
172 different between the two models, there is a shift of one position in the helix and therefore  
173 different residue arrangements.

174 **OR5K1 model refinement.** AF2 and HM models propose two different ligand positions and  
175 binding poses. We performed induced-fit docking (IFD) simulations (Schrödinger Release  
176 2021-3: Induced Fit Docking protocol; Glide, Schrödinger, LLC, New York, NY, 2021; Prime,  
177 Schrödinger, LLC, New York, NY, 2021)<sup>74</sup> with the most active compounds (compound **1**) for  
178 both AF2 and HM, allowing the flexibility of the binding site side chains to explore the  
179 conformational space of the orthosteric binding site of the two models. 44 models were  
180 generated starting from the AF2 model and 57 from HM. The ROC curves of these models  
181 show an improvement in their performance, the best models have AUC values of 0.81 and 0.85,  
182 and EF<sub>15%</sub> of 0.24 and 0.50 for AF2 and HM, respectively (Figure S5). The binding modes of  
183 compound **1** in the best models of AF2 and HM are different but the ligand is now located in  
184 the core of the orthosteric binding site in both models (Figure S5). Interestingly, we noticed that  
185 two leucine residues, L104<sup>3,32</sup> and L255<sup>6,51</sup>, are predicted to be in the binding pocket by both  
186 models (Figure S5). Odorant molecules are typically small organic compounds of less than 300  
187 Da with high-to-moderate hydrophobicity and their binding to ORs is driven by shape  
188 complementarity and mostly hydrophobic interactions.<sup>64, 75</sup>

189 L104<sup>3,32</sup> is conserved in 98% of orthologs investigated across 51 species, except for the receptor  
190 of the new world monkey *Aotus nancymaae* (XP\_012332612.1), where a rather conservative  
191 amino acid exchange replaced the leucine at position 104 by an isoleucine (Figure S7, Table  
192 S5). Similarly, L255<sup>6,51</sup> of OR5K1 is conserved in 96% of all orthologs, except for the receptors  
193 of *Aotus nancymaae*, *Loxodonta africana* (African elephant, XP\_003418985.1), and  
194 *Urocitellus parryii* (Arctic ground squirrel, XP\_026258216.1). In all three orthologs and in the  
195 human paralog OR5K2, again, a rather conservative amino acid exchange replaced the leucine  
196 at position 255 by an isoleucine (Figure S7, Table S5). Single nucleotide missense variations  
197 have been reported for both amino acid positions, L104<sup>3,32</sup>I (rs777947557) and L255<sup>6,51</sup>F  
198 (rs1032366530) in human OR5K1, albeit with frequencies way below 0.01. Moreover, both

199 positions L104<sup>3,32</sup> and L255<sup>6,51</sup> are part of a set of 22 amino acids that have been suggested  
200 previously to constitute a generalized odorant binding pocket in ORs.<sup>76</sup> Both amino acid  
201 positions have been identified also experimentally as odorant interaction partners in different  
202 receptors by several independent studies.<sup>24, 36, 62, 77-82</sup> Therefore, these leucine residues are likely  
203 to play a relevant role in the ligand recognition of OR5K1 agonists. We mutated these residues  
204 to alanine (L104<sup>3,32</sup>A, L255<sup>6,51</sup>A) and found that there is a shift in EC<sub>50</sub> values for both mutants  
205 when stimulated with compound 1: EC<sub>50</sub> of 525.28 ± 92.28 μM for L104<sup>3,32</sup>A and EC<sub>50</sub> of  
206 478.36 ± 185.10 μM for OR5K1 L255<sup>6,51</sup>A (Figure 2a). Monitoring the distance between the  
207 centroid of the ligand and the center between the C<sub>α</sub> atoms of the two leucine residues on the  
208 poses obtained with IFD simulations, we observed that, while for the HM, this distance reaches  
209 the 0.2 nm, for the AF2 model it is above 0.4 nm (Figure 2b).

210 To improve the conformational rearrangement around the ligand, we performed a second round  
211 of IFD simulations, allowing the flexibility of the binding site side chains around compound 1.  
212 With the second round of simulations, there is a better sampling for HM conformations and an  
213 enrichment of poses in close contact with L104<sup>3,32</sup> and L255<sup>6,51</sup> for the AF2 model (Figure 2b).

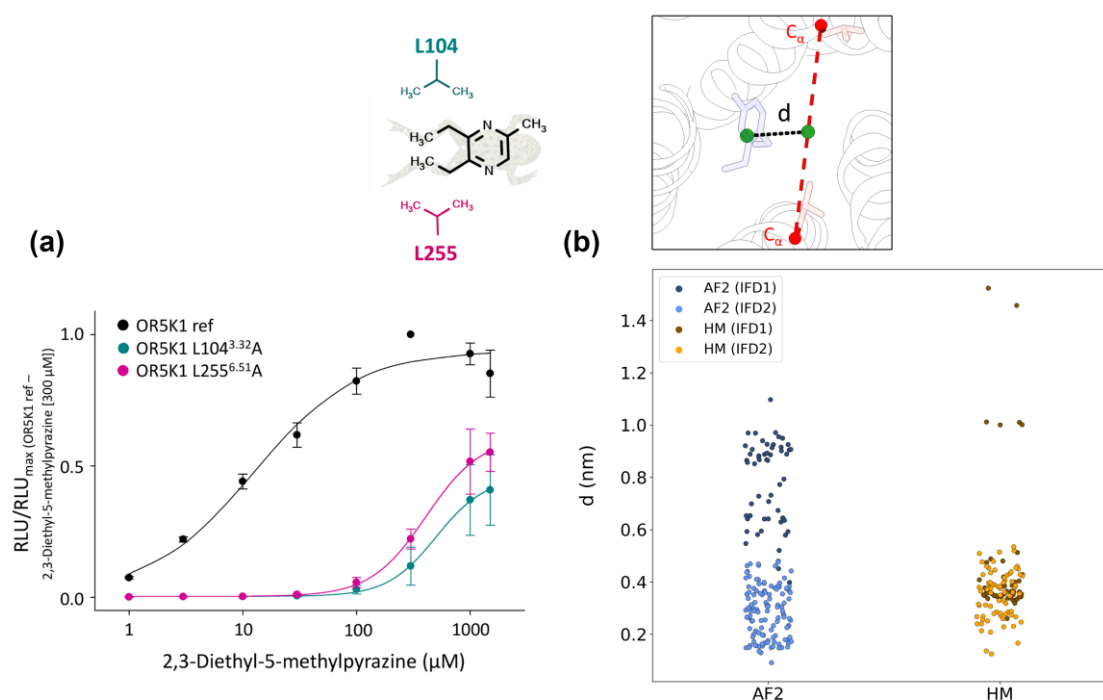

214

215 **Figure 2:** Concentration–response relations of compound **1** (2,3-diethyl-5-methylpyrazine) on OR5K1 ref (black),  
216 OR5K1 L104<sup>3.32</sup>A (turquoise), and OR5K1 L255<sup>6.51</sup>A (pink). Data were mock control-subtracted, normalized to the  
217 response of OR5K1 ref to 2,3-diethyl-5-methylpyrazine (300  $\mu$ M) and displayed as mean  $\pm$  SD (n = 4). RLU =  
218 relative luminescence units. **(b)** Distance between the ligand centroid and the center between L104<sup>3.32</sup> and L255<sup>6.51</sup>  
219 alpha carbons in the first and second IFD simulation rounds.

220

221 Then we analyzed all the poses where the ligand is close to L104<sup>3.32</sup> and L255<sup>6.51</sup> (with a distance  
222 below 0.4 nm): 106 structures for AF2 (1 from the first round of IFD and 105 from the second  
223 round) and 110 for HM (39 from the first round of IFD and 71 from the second round). We  
224 clustered the complexes into 31 and 34 possible binding poses for AF2 and HM, respectively.  
225 The distribution of the clusters is reported in Figure S6. Among all the potential binding modes,  
226 6 models from the refinement of AF2 model and 12 structures from the refinement of HM have  
227 an AUC higher than 0.8 (Table S1). These may be considered the most predictive binding site  
228 conformations and were submitted to a third round of IFD simulations for the extensive  
229 sampling of the conformational space of L104<sup>3.32</sup> and L255<sup>6.51</sup>. This generates 555 structures  
230 from the model refined from AF2 and 431 structures from the model refined from HM with  
231 AUC greater than 0.8 and distance between the ligand centroid and the center between L104<sup>3.32</sup>  
232 and L255<sup>6.51</sup> alpha carbons lower than 0.4 nm. Despite the high similarity of generated  
233 structures, we could appreciate different sampled binding modes (37 clusters from HM and 30  
234 clusters from AF2, Figure S8). The best performing structures for each cluster are available at  
235 [https://github.com/dipizio/OR5K1\\_binding\\_site](https://github.com/dipizio/OR5K1_binding_site). Considering the performance, the shape of the  
236 ROC curves and the contribution to the binding of L104<sup>3.32</sup> and L255<sup>6.51</sup>, we selected the binding  
237 poses shown in Figure 3.

238 The starting models obtained from AF2 and HM have different conformations of the TM helices  
239 that prevent reaching convergence when sampling only the side chain conformations. As an

240 example, in Figure 3, it is possible to appreciate the difference in the shift of TM7 residues in  
241 the two models: position 7.42 is F278 in the model from AF2 and T279 in the model from HM.

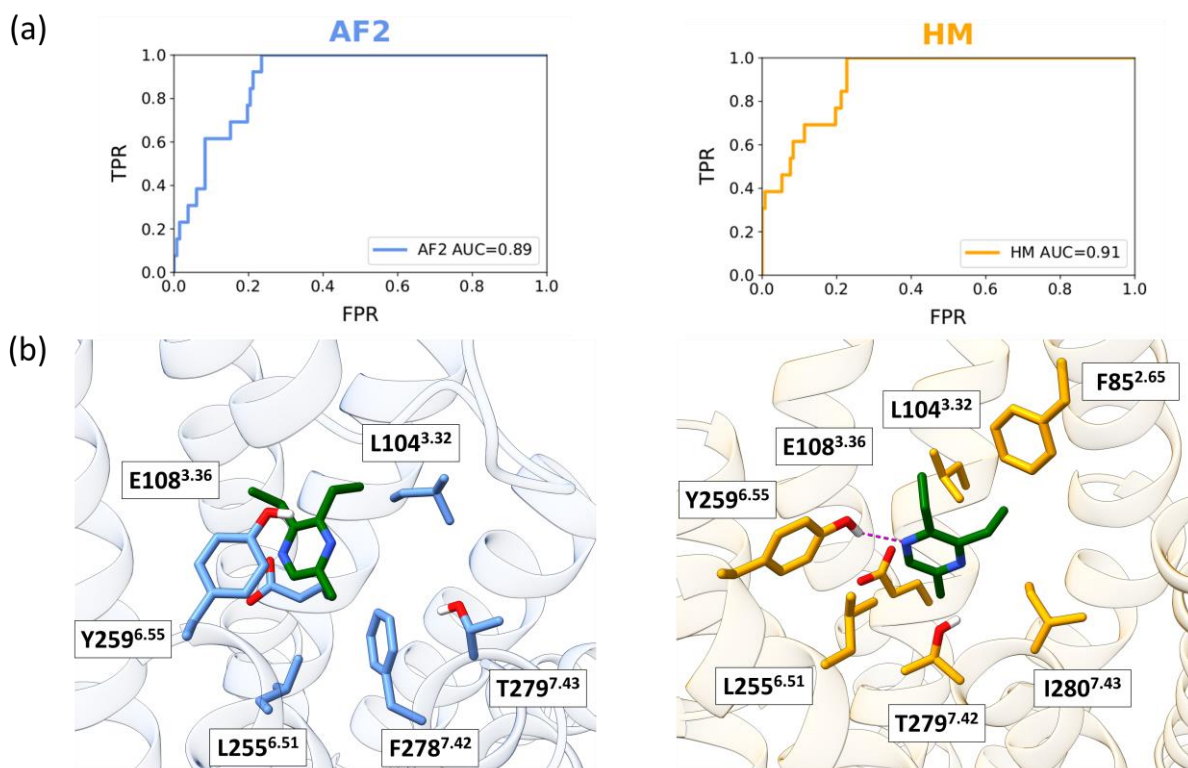

242  
243 **Figure 3. (a)** ROC curves and **(b)** binding modes of compound **1** into the OR5K1 binding site of the best AF2 and  
244 HM models obtained after the extensive sampling of the conformational space of L104<sup>3.32</sup> and L255<sup>6.51</sup>. We show  
245 as stick residues in the binding site positions that are in common between the two models. Residue F85<sup>2.65</sup> is only  
246 reported for the HM model, because TM2 in the AF2 model is not pointing to the binding site (the C $\alpha$  atoms of  
247 F85 in the two models are 8.85 Å distant).

248  
249 However, the ligand in both models is oriented in a similar position and interacts with L104<sup>3.32</sup>  
250 and L255<sup>6.51</sup>. L104<sup>3.32</sup> and L255<sup>6.51</sup> interact with the aliphatic chains attached to the pyrazine  
251 moiety and might play a relevant role on ligand selectivity. Indeed, we have shown that even  
252 isomers, such as compounds **2** and **13**, elicit different receptor activation (Figure 4).

253

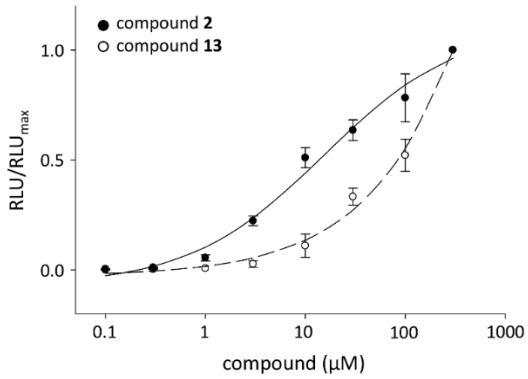

254

255 **Figure 4.** Concentration-response relations of 2-ethyl-3,6-dimethylpyrazine (compound **2**) and 2-ethyl-3,5-  
256 dimethylpyrazine (compound **13**) on OR5K1. Data were mock control-subtracted, normalized to the OR5K1 signal  
257 of each ligand, and displayed as mean  $\pm$  SD of independent transfection experiments ( $n = 4$ ). RLU = relative  
258 luminescence units.

259

260 We computationally mutated L104<sup>3,32</sup> and L255<sup>6,51</sup> to alanine residues in these two models.  
261 Interestingly, the docking scores correlate with the drop in activation values observed  
262 experimentally and are highly influenced by the van der Waals (vdW) contribution of the  
263 leucine residues (Figure 5). Also, the docking scores of compound **2** in both models are lower  
264 than those of compound **13**. Therefore, both models seem to be able to capture most differences  
265 in activity related to small structural differences either at the ligand or receptor side.

266

267

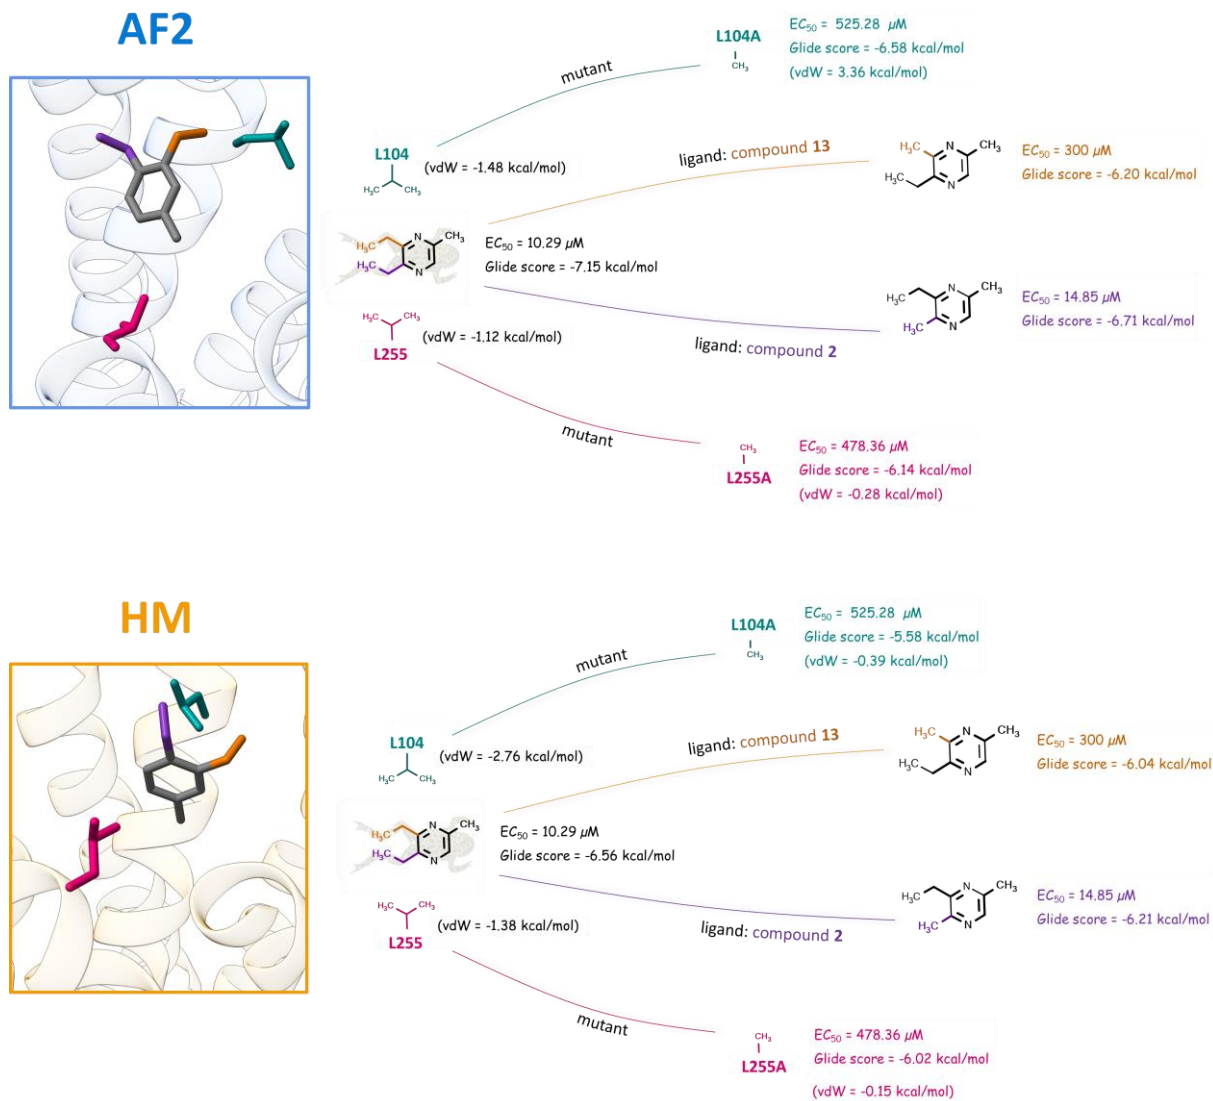

268

269 **Figure 5.** Schematic representation of binding mode of pyrazines **1**, **2** and **13** in the OR5K1 binding site of selected  
 270 models. For compound **1**, we report also docking scores of the mutant models.

271

272

## 273 CONCLUSIONS

274 ORs are class A GPCRs for which we do not have experimental structures and that share a very  
275 low sequence identity with non-sensory GPCRs. The small size of OR modulators and the low  
276 resolution of the structure modeling represent a major challenge for the investigation of the  
277 molecular recognition mechanisms of this important class of receptors. Most ORs are still  
278 orphan and the receptive range of a few ORs has been characterized until now. In this paper,  
279 we used the recently published ligand information on OR5K1<sup>50</sup> to model and refine the OR5K1  
280 orthosteric binding site. We used a multi-template homology modeling approach, as previously  
281 suggested to be a successful strategy for OR modeling.<sup>20-21, 23, 62</sup> Moreover, we further refined  
282 the ECL2 loop, which we previously identified to be a necessary procedure for low resolution  
283 GPCR modeling.<sup>70, 83-84</sup>

284 We also used the AlphaFold 2 model of OR5K1 for our analyses. This allowed us to evaluate  
285 the use of AlphaFold2 OR structures for ligand-protein interaction studies. AF2 and HM models  
286 have differences in the backbone that unavoidably affect the binding site conformations. A  
287 difference between HM and AF2 models is the activation state. The prevalence of GPCR  
288 models in the inactive state has been addressed in a recent paper by Heo et al.,<sup>85</sup> and the authors  
289 found that this may also affect the accuracy of binding site predictions and proposed multi-state  
290 models of GPCRs.

291 Altogether, we found that the refinement was a necessary step for both HM and AF2 models.  
292 The refinement process of AF2 model was needed not only to improve the performance, as for  
293 HM, but also to open the orthosteric binding site and allow docking of agonists. Through the  
294 modeling, we could identify relevant residues for the activity of OR5K1 agonists, namely,  
295 L104<sup>3,32</sup> and L255<sup>6,51</sup>. These positions are highly conserved in OR5K1 orthologs across 51 species  
296 and have an extremely low frequency of SNP-based missense variations according to the 1000



297 Genomes Project. The support of mutagenesis experiments furnished precious experimental  
298 information for model refinement.

299 In summary, we propose here an iterative experimental-computational workflow that allowed  
300 us to explore the conformational space of OR5K1 binding site and can be used to model the  
301 orthosteric binding site of ORs as well as that of GPCRs with low sequence identity to available  
302 templates.

## 303 MATERIALS AND METHODS

304 **Synthesis of 2-ethyl-3,5(6)-dimethylpyrazine.** 2-ethyl-3,5(6)-dimethylpyrazines were  
305 synthesized according to Czerny et al.<sup>86</sup> by a Grignard-type reaction. Briefly, a solution of  
306 ethylmagnesium bromide in tetrahydrofuran (20 mL; 1.0 M; 20 mmol) was placed in a three-  
307 necked flask (100 mL) equipped with a reflux condenser, a dropping funnel and an argon inlet.  
308 While stirring at 40 °C a small portion of the respective reactant (2.2 g; 20 mmol) solved in 20  
309 mL THF was added dropwise via the dropping funnel. 2,5-dimethylpyrazine was used for the  
310 synthesis of 2-ethyl-3,6-dimethylpyrazine and 2,6-isomere was taken as starting material for 2-  
311 ethyl-3,5-dimethylpyrazine. After the mixture was refluxed (73°C) the residual 2,5(6)-  
312 dimethylpyrazine solution was added over a period of 30 min. The mixture was stirred under  
313 reflux for 2 h, cooled to room temperature, and water (20 mL) was added dropwise. The  
314 emulsion was extracted with diethyl ether (3 ×50 mL) and dried over anhydrous Na<sub>2</sub>SO<sub>4</sub>. The  
315 compounds were purified by means of flash column chromatography. For this purpose, the  
316 concentrated extract (1.0 mL) was placed on the top of a water-cooled glass column (33 × 2.5  
317 cm) filled with a slurry of silica gel 60 (with the addition of 7 % water, 40 – 63 μm, Merck,  
318 Darmstadt, Germany, # 1.09385.2500) and n-pentane. The target compounds were eluted with  
319 n-pentane/diethyl ether (100 ml, 40:60, v/v). The purity of each target compound was analyzed  
320 by gas chromatography-mass spectrometry (GC-MS) and nuclear magnetic resonance (NMR).  
321 For determining the concentration of each 2-ethyl-3,5(6)-dimethylpyrazine, quantitative NMR  
322 (qNMR) was applied. For the NMR experiments, the solvent was distilled off and the residue  
323 was solved in CDCl<sub>3</sub>.

324 2-ethyl-3,5-dimethylpyrazine: MS (EI): *m/z* (%) 135 (100), 136 (M<sup>+</sup>, 81), 42 (18), 108 (17),  
325 107 (15), 56 (12). <sup>1</sup>H-NMR (CDCl<sub>3</sub>, 400 MHz, 25 °C) δ (ppm) 8.15 (s, 1 H, H-C6), 2.80 (q,  
326 *J*=7.6, 2H, H-C7), 2.53 (s, 3 H, H-C9/10), 2.49 (s, 3 H, H-C9/10), 1.27 (t, *J*=7.6, 3H, H-C8).

327 2-ethyl-3,6-dimethylpyrazine: MS (EI):  $m/z$  (%) 135 (100), 136 ( $M^+$ , 92), 56 (24), 108 (16), 42  
328 (12), 107 (11).  $^1\text{H-NMR}$  (400 MHz,  $\text{CDCl}_3$ )  $\delta$  (ppm) 8.20 (s, 1 H, H-C6), 2.81 (q,  $J=7.5$ , 2H,  
329 H-C7), 2.54 (s, 3 H, H-C9/10), 2.49 (s, 3 H, H-C9/10), 1.28 (t,  $J=7.5$ , 3H, H-C8).

330

331 **Nuclear magnetic resonance (NMR).** NMR experiments were performed using an Avance III  
332 400 MHz spectrometer equipped with a BBI probe (Bruker, Rheinstetten, Germany). Topspin  
333 software (version 3.2) was used for data acquisition. For structure elucidation the compounds  
334 were solved in chloroform-d ( $\text{CDCl}_3$ ). Chemical shifts were referenced against solvent signal.  
335 Quantitative  $^1\text{H-NMR}$  (qNMR) was done according to Frank et al.<sup>87</sup> For this, an aliquot (600  
336  $\mu\text{L}$ ) of the dissolved solutions was analyzed in NMR tubes ( $5 \times 178$  mm, Bruker, Faellanden,  
337 Switzerland).

338

339 **Gas chromatography – mass spectrometry (GC-MS).** Mass spectra of the synthesized  
340 pyrazines in the electron ionization mode were recorded using a GC-MS system consisting of  
341 a Trace GC Ultra gas chromatograph coupled to a single quadrupole ISQ mass spectrometer  
342 (Thermo Fisher Scientific, Dreieich, Germany) as described more detailed by Porcelli et al.<sup>88</sup>  
343 A DB-1701 coated fused silica capillary column ( $30 \text{ m} \times 0.25 \text{ mm i.d.}$ ,  $0.25 \mu\text{m}$  film thickness;  
344 Agilent, Waldbronn, Germany) was taken for chromatographic separation using the following  
345 temperature program:  $40^\circ\text{C}$  held for 2 min, then it was raised at  $10^\circ\text{C}/\text{min}$  to  $230^\circ\text{C}$  (held for  
346 4 min). Mass spectra were acquired at a scan range of 40–300  $m/z$  at an ionization energy of 70  
347 eV. The mass spectra were evaluated using Xcalibur 2.0 software (Thermo Fisher Scientific).

348

349 **Molecular cloning of OR5K1.** The protein-coding region of human OR5K1  
350 (NM\_001004736.3) derived from our previously published OR library.<sup>89</sup> Amplification was

351 carried out in a touchdown approach using gene-specific primers (Table S2): an initial  
352 denaturation (98 °C, 3 min) and ten cycles consisting of denaturation (98 °C, 30 s), annealing  
353 (60 °C, decreasing 1 °C per cycle down to 50 °C, 30 s), and extension (72 °C, 1 min), followed  
354 by 25 cycles of denaturation (98 °C, 30 s), annealing (50 °C, 30 s), and extension (72 °C, 1  
355 min), finishing with a final extension step in the end (72 °C, 7 min). Insertion of nucleotides  
356 into expression vectors was done with T4-DNA ligase (#M1804, Promega, Madison, USA) via  
357 EcoRI/NotI (#R6017/#R6435, Promega, Madison, USA) into the expression plasmid  
358 pFN210A,<sup>90</sup> and verified by Sanger sequencing using internal primers (Table S3) (Eurofins  
359 Genomics, Ebersberg, Germany).

360

361 **PCR-based site-directed mutagenesis.** Mutants L104<sup>3.32</sup> and L255<sup>6.51</sup> were generated by PCR-  
362 based site-directed mutagenesis in two steps. Utilized mutation primers were designed  
363 overlapping and are listed in Table S4. Step one PCR was performed in two amplifications, one  
364 with the forward vector-internal primer and the reverse mutation-primer, the other with the  
365 forward mutation-primer and the reverse vector-internal primer. Amplification was performed  
366 with the touchdown approach described above. Both PCR amplicons were then purified and  
367 used as template for step two. The two overlapping amplicons were annealed using the  
368 following touchdown program: denaturation (98 °C, 3 min), ten cycles containing denaturation  
369 (98 °C, 30 s), annealing (start 60 °C, 30 s), and extension (72 °C, 2 min). After this, vector-  
370 internal forward and reverse primers were added and 25 further cycles of denaturation (98 °C,  
371 30 s), annealing (50 °C, 30 s), and extension (72 °C, 1 min) were carried out, finishing with a  
372 final extension step in the end (72 °C, 7 min). The amplicons were then sub-cloned as described  
373 above.

374

375 **Cell culture and transient DNA transfection.** We utilized HEK-293 cells,<sup>91</sup> a human  
376 embryonic kidney cell-line, as a test cell system for the functional expression of ORs.<sup>92</sup> Cells  
377 were cultivated at 37 °C, 5% CO<sub>2</sub>, and 100% humidity in 4.5 g/L D-glucose containing DMEM  
378 with 10% fetal bovine serum, 2 mM L-glutamine, 100 U/mL penicillin, and 100 U/mL  
379 streptomycin. Cells were cultured in a 96-well format (Nunclon™ Delta Surface, #136102;  
380 Thermo Fisher Scientific, Schwerte, Germany) at 12,000 cells/well overnight. Then, cells were  
381 transfected utilizing 0.75 µL/well ViaFect™ (#E4981, Promega, USA) with the following  
382 constructs: 100 ng/well of the respective OR construct, 50 ng/well of chaperone RTP1S,<sup>93</sup> 50  
383 ng/well of the G protein subunit G $\alpha_{olf}$ ,<sup>94-95</sup> olfactory G protein subunit G $\gamma$ 13,<sup>96</sup> and 50 ng/well  
384 of pGloSensor™-22F (Promega, Madison, USA).<sup>97</sup> The utilized pGloSensor™-22F is a  
385 genetically engineered luciferase with a cAMP-binding pocket, allowing for measurements of  
386 a direct cAMP-dependent luminescence signal. All measurements were mock-controlled, i.e.  
387 pFN210A without OR was transfected in parallel.

388

389 **Luminescence assay.** Concentration-response assays were measured 42 hours post-  
390 transfection as described previously.<sup>92</sup> In short, supernatant was removed and cells were loaded  
391 with a physiological salt buffer (pH 7.5) containing 140 mmol/L NaCl, 10 mmol/L HEPES, 5  
392 mmol/L KCl, 1 mmol/L CaCl<sub>2</sub>, 10 mmol/L glucose, and 2% of beetle luciferin sodium salt  
393 (Promega, Madison, USA). For luminescence measurements, the GloMax® Discover  
394 microplate reader (Promega, Madison, USA) was used. After an incubation for 50 minutes in  
395 the dark, the basal luminescence signal of each well was recorded thrice. Then the odorant,  
396 serially diluted in the physiological salt buffer with added Pluronic PE-10500 (BASF,  
397 Ludwigshafen, Germany), was applied to the cells and luminescence was measured thrice after  
398 ten minutes of incubation time. The final Pluronic PE-10500 concentration on the cells was  
399 0.05%.

400 **Data analysis of the cAMP-luminescence measurements.** The raw luminescence data  
401 obtained from the GloMax® Discover microplate reader detection system were analyzed for  
402 concentration/response assays by averaging both data points of basal levels and data points after  
403 odorant application. For a given luminescence signal, the respective basal level was subtracted  
404 and the now corrected data set was normalized to the maximum amplitude of the reference. The  
405 data set for the mock control was subtracted and EC<sub>50</sub> values and curves were derived from  
406 fitting the function:

$$407 \quad f(x) = \left( \frac{(min - max)}{\left(1 + \left(\frac{x}{EC_{50}}\right)^{Hillslope}\right)} \right) + max$$

408 to the data by nonlinear regression (SigmaPlot 14.0, Systat Software).<sup>98</sup> Data are presented as  
409 mean ± SD.

410

411 **Phylogenetic analysis.** NCBI<sup>99</sup> was used as database for the retrieval of genetic information on  
412 *Homo sapiens* (human) odorant receptor genes as well as orthologous receptor genes of OR5K1  
413 (for accession numbers see Table S5). The phylogenetic reconstruction of ORs was performed  
414 with QIAGEN CLC Genomics Workbench 21.0 (<https://digitalinsights.qiagen.com/>) and  
415 MEGA X software.<sup>100</sup> Therefore, in a first step, all sequences were aligned using ClustalW  
416 algorithm.<sup>101</sup> The evolutionary history was inferred using the Neighbor-Joining method <sup>102</sup>  
417 followed by 500 bootstrap replications.<sup>103</sup> Scale bar refers to the evolutionary distances,  
418 computed using the Poisson correction method.<sup>104</sup> Evolutionary analyses were conducted in  
419 MEGA X.<sup>100</sup> For rooting the constructed tree, human rhodopsin (NCBI entry: NP\_000530.1)  
420 was used as an out-group.

421

422 **Homology Modeling.** Rhodopsin receptor (PDB ID: 4X1H),  $\beta$ 2- adrenergic receptor (PDB ID:  
423 6MXT), CXCR4 receptor (PDB ID: 3ODU), and A2A receptor (PDB ID: 2YDV) were used as  
424 templates for modeling the 3D structure of OR5K1, following the template selection from de  
425 March et al. 2015.<sup>20</sup> The structures were downloaded from GPCRdb,<sup>105</sup> and their sequences  
426 were aligned to the OR5K1 sequence (residues 20-292) with the Protein Structure Alignment  
427 module available in Maestro (Schrödinger Release 2021-3, Maestro, Schrödinger, LLC, New  
428 York, NY, 2021). The sequence alignment was then manually adjusted, ensuring that conserved  
429 GPCR residues were correctly aligned (Figure S1). OR5K1 shares a sequence identity of 19%  
430 with 6MXT.pdb, of 15% with 4X1H.pdb, of 15% with 3ODU.pdb and of 16% with 2YDV.pdb.  
431 We modeled the ECL2 region (S157<sup>4.57</sup>- L188<sup>5.37</sup>) using as templates NPY2 (PDB ID: 7DDZ)  
432 and CCK1 (PDB ID: 7MBY) for the before-Cys<sup>45.50</sup> segment, and apelin (PDB ID: 6KNM) for  
433 the after-Cys<sup>45.50</sup> segment (Figures S2 and S3). We also remodeled the region between P81<sup>2.58</sup>  
434 and L105<sup>3.32</sup> with the NPY2 to ensure the correct orientation of the ECL2 towards TM3 and  
435 ECL1, and the formation of the conserved disulfide bridge between C<sup>3.25</sup> and C<sup>45.50</sup>. 100  
436 homology models were generated using MODELLER v9.23.<sup>106</sup> Four models were selected  
437 based on the DOPE score and visual inspection of the ECL2 and the most predictive model,  
438 based on ROC AUC (see the paragraph Molecular Docking) was chosen for the following  
439 analysis.

440

441 **Protein preparation and binding site analysis.** OR5K1 AF2 model was downloaded from the  
442 AlphaFold 2 database (<https://alphafold.ebi.ac.uk/entry/Q8NHB7>). OR5K1 AF2 and HM were  
443 superimposed through the Protein Structure Alignment module available in Maestro  
444 (Schrödinger Release 2021-3, Maestro, Schrödinger, LLC, New York, NY, 2021). Hydrogen  
445 atoms and side chains of both models were optimized with the Protein Preparation Wizard tool  
446 at physiological pH (Schrödinger Release 2021-3, Maestro, Schrödinger, LLC, New York, NY,  
447 2021). Ramachandran plots were generated to verify the reliability of the backbone dihedral

448 angles of amino acid residues in the models. The A100 tool was used to investigate the  
449 activation state of the models.<sup>69</sup>

450 SiteMap tool (Schrödinger Release 2021-3: SiteMap, Schrödinger, LLC, New York, NY, 2021)  
451 was used to characterize the binding cavities of both models.

452

453 **Molecular Docking.** The compounds used in the screening by Marcinek et al. were used for  
454 the model evaluation.<sup>50</sup> However, we excluded from this set 54 molecules employed as a  
455 mixture of isomers. Indeed, the measured activity of the mixture may not correspond to the  
456 activity of the individual stereoisomers (e.g., only one stereoisomer is active) and compromise  
457 our validation. Among the subset of molecules with defined stereochemistry, we selected 11  
458 agonists with EC<sub>50</sub> values below 600 µM and compounds characterized in this work were  
459 included in the list of active molecules (Table 1). 131 compounds that did not elicit receptor  
460 response were used as inactives (the list of compounds is available at  
461 [https://github.com/dipizio/OR5K1\\_binding\\_site](https://github.com/dipizio/OR5K1_binding_site)).

462 3D structures of ligands and inactive molecules were retrieved from PubChem through CAS  
463 numbers and prepared for docking through the generation of stereoisomers and protonation  
464 states at pH 7.2 ± 0.2 with LigPrep, as implemented in the Schrödinger Small-Molecule Drug  
465 Discovery Suite 2021 (LigPrep, Schrödinger, LLC, New York, NY, 2021). Glide Standard  
466 Precision (Glide, Schrödinger, LLC, New York, NY, 2021)<sup>107-108</sup> was used for docking all  
467 compounds to the OR5K1 models. The grid box was centroid of SiteMap grid points for HM  
468 and AF2 binding pockets combined together for the models obtained after the first round of  
469 IFD, and instead was centroid of the docked 2,3-diethyl-5-methylpyrazine (compound **1**) for  
470 the models obtained after the second round of IFD simulations.



471 The docking poses of compound **1** within OR5K1 mutants were performed using the *in-place*  
472 docking (Glide Standard precision), generating the grid from the centroid of the docked  
473 compound. Mutants were generated with the ‘Mutate residue’ tool available in Maestro.

474 An in-house python script based on Scikit-learn (v0.24.2) package was used for the ROC curve  
475 analysis,<sup>109</sup> and the data were plotted with Matplotlib Python library.<sup>110</sup> AUC and EF<sub>15%</sub> of the  
476 training library were used to evaluate the performance of each model in discriminating between  
477 active and inactive compounds.

478 The ROC curves were obtained plotting False Positive Rate (FPR) vs. True Positive Rate (TPR).  
479 TPR and FPR values are calculated by the following equations:

$$480 \quad TPR = \frac{TP}{(TP + FN)}$$

481 where TP is the number of true positive compounds, and FN is the number of false negative  
482 compounds.

$$483 \quad FPR = \frac{FP}{(TN + FP)}$$

484 where FP is the number of false positive compounds, and TN is the number of true negative  
485 compounds.

486 EF<sub>15%</sub> values are calculated by the following equation:

$$487 \quad EF_{15\%} = \frac{N_{actives (15\%)}}{N_{inactives (15\%)}}$$

488 where  $N_{actives (15\%)}$  and  $N_{inactives (15\%)}$  represent the number of actives and inactives, respectively,  
489 in the 15% of ranked screened compounds.

490

491 **Induced-fit docking simulations.** In the first round of simulations, HM and AF2 starting  
492 models were used for IFD simulations using Schrödinger Suite 2021 Induced Fit Docking

493 protocol (Glide, Schrödinger, LLC, New York, NY, 2021; Prime, Schrödinger, LLC, New  
494 York, NY, 2021).<sup>111</sup> 2,3-diethyl-5-methylpyrazine was used as ligand and the flexibility of the  
495 side chains at 3 Å from the SiteMap grid points was allowed. The best structures based on AUC  
496 values and visual inspection from IFD1 (4 structures after refinement of HM and 7 after  
497 refinement of AF2 model) underwent to a second round of simulations (IFD2). In the second  
498 round of simulations, the residues at 4 Å from the ligand (2,3-diethyl-5-methylpyrazine) were  
499 allowed to move. The most predictive structures from IFD2 (Table S1) were submitted to a  
500 third round of IFD simulations (IFD 3), in which only the side chains of L104<sup>3,32</sup> and L255<sup>6,51</sup>  
501 and the ligand were treated as flexible. For an extensive sampling of the leucine residues, we  
502 used as ligand both compound **1** and **2**.

503

504 **Clustering of docking poses.** For all poses from IFD1, IFD2, and IDF3 we monitored the  
505 distance between the ligand centroid and the center between L104<sup>3,32</sup> and L255<sup>6,51</sup> alpha  
506 carbons. The centroids and distances were calculated using PLUMED (version 2.7).<sup>112-114</sup> The  
507 docking poses from IDF1 and IDF2 with a distance below 0.4 nm were clustered using the  
508 conformer\_cluster.py from Schrödinger (<https://www.schrodinger.com/scriptcenter>). First, a  
509 pair-wise RMSD matrix was calculated for compound **1** and the residues within 7 Å of its  
510 centroid (for HM, residues 104, 105, 108, 159, 199, 202, 206, 255, 256, 276, 279, 280; for AF2,  
511 residues: 101, 104, 105, 108, 178, 180, 181, 199, 255, 258, 259, 275, 278, 279), and then the  
512 complexes were clustered using the hierarchical cluster method (average group linkage). The  
513 number of clusters was set to 31 for AF2 and 34 for HM based on the second minimum of the  
514 Kelly-Penalty score. Docking poses obtained from IDF3 were filtered by distance (below 0.4  
515 nm), AUC (greater than 0.8) and the conformations of the binding site were clustered using the  
516 conformer\_cluster.py from Schrödinger. RMSD matrices of best performing structures from  
517 the different clusters were calculated with rmsd.py from Schrödinger (Figure S8).

518 ChimeraX (v1.3) was used to render the protein images.<sup>115</sup>

519

## 520 DATA AND SOFTWARE AVAILABILITY

521 The dataset and refined models can be downloaded from  
522 [https://github.com/dipizio/OR5K1\\_binding\\_site](https://github.com/dipizio/OR5K1_binding_site).

523

524 **Supporting Information.** Multiple Sequence Alignment of OR5K1 with templates (Figure  
525 S1); ECL2 for OR5K1 and experimental class A GPCRs (Figure S2); OR5K1 models built with  
526 AlphaFold 2 and homology modeling (Figure S3); ROC analysis of the starting OR5K1 AF2  
527 and HM models (Figure S4); Binding modes and ROC analyses of the OR5K1 AF2 and HM  
528 models after the first IFD simulation round (Figure S5); Distribution of the clusters binding  
529 poses of compound 1 in proximity to L104<sup>3,32</sup> and L255<sup>6,51</sup> (Figure S6); Leucine residues  
530 L104<sup>3,32</sup> and L255<sup>6,51</sup> are highly conserved in OR5K1 homologs (Figure S7); RMSD matrices  
531 for the orthosteric binding site of the best performing models obtained after clustering IFD3  
532 models (Figure S8); Models from IFD1 and IFD2 with  $d < 0.4$ ,  $AUC > 0.8$  (Table S1);  
533 Oligonucleotides for molecular cloning of OR5K1 (Table S2); Vector internal oligonucleotides  
534 (Table S3); Oligonucleotides for Homo sapiens OR5K1 site directed mutagenesis (Table S4);  
535 NCBI reference sequences of olfactory receptor genes investigated (Table S5).

536 **AUTHOR INFORMATION**

537 Corresponding Authors

538 Antonella Di Pizio – Molecular Modeling Group, Leibniz Institute for Food Systems Biology  
539 at the Technical University of Munich, 85354 Freising, Germany; ORCID:  
540 <https://orcid.org/0000-0002-8520-5165> ; Email: [a.dipizio.leibniz-lsb@tum.de](mailto:a.dipizio.leibniz-lsb@tum.de)

541 Dietmar Krautwurst - Taste and Odor Systems Reception Group, Leibniz Institute for Food  
542 Systems Biology at the Technical University of Munich, 85354 Freising, Germany; Email:  
543 [d.krautwurst.leibniz-lsb@tum.de](mailto:d.krautwurst.leibniz-lsb@tum.de)

544

545 Authors

546 Alessandro Nicoli - Molecular Modeling Group, Leibniz Institute for Food Systems Biology at  
547 the Technical University of Munich, 85354 Freising, Germany, ORCID: [https://orcid.org/0000-](https://orcid.org/0000-0001-6177-9749)  
548 [0001-6177-9749](https://orcid.org/0000-0001-6177-9749)

549 Franziska Haag - Taste and Odor Systems Reception Group, Leibniz Institute for Food Systems  
550 Biology at the Technical University of Munich, 85354 Freising, Germany, ORCID:  
551 <https://orcid.org/0000-0003-4210-0475>

552 Patrick Marcinek - Taste and Odor Systems Reception Group, Leibniz Institute for Food  
553 Systems Biology at the Technical University of Munich, 85354 Freising, Germany

554 Ruiming He - Molecular Modeling Group, Leibniz Institute for Food Systems Biology at the  
555 Technical University of Munich, 85354 Freising, Germany; Department of Chemistry,  
556 Technical University of Munich, D-85748 Garching

557 Johanna Kreißl – Analytical Technologies, Leibniz Institute for Food Systems Biology at the  
558 Technical University of Munich, 85354 Freising, Germany; ORCID: [https://orcid.org/0000-](https://orcid.org/0000-0002-5252-0409)  
559 [0002-5252-0409](https://orcid.org/0002-5252-0409)

560 Jörg Stein - Food Metabolome Chemistry Group, Leibniz Institute for Food Systems Biology  
561 at the Technical University of Munich, 85354 Freising, Germany

562 Alessandro Marchetto - Computational Biomedicine group, Institute for Advanced Simulations  
563 (IAS)-5/Institute for Neuroscience and Medicine (INM)-9, Forschungszentrum Jülich, 52428  
564 Jülich, Germany; Faculty of Mathematics, Computer Science and Natural Sciences, RWTH  
565 Aachen University, 52062 Aachen, Germany, ORCID: <https://orcid.org/0000-0001-9857-4376>

566 Andreas Dunkel - Integrative Food Systems Analysis Group, Leibniz Institute for Food Systems  
567 Biology at the Technical University of Munich, 85354 Freising, Germany

568 Thomas Hofmann - Chair of Food Chemistry and Molecular Sensory Science, Technical  
569 University of Munich, 85354 Freising, Germany

570

571 Author Contributions

572 The manuscript was written through the contributions of all authors. All authors have approved  
573 the final version of the manuscript.

574 ‡These authors contributed equally.

575

576

577

578 **REFERENCES**

- 579 (1) Hall, R. A.; Premont, R. T.; Lefkowitz, R. J., Heptahelical receptor signaling: beyond the G protein  
580 paradigm. *J Cell Biol* **1999**, *145* (5), 927-32.
- 581 (2) Pierce, K. L.; Premont, R. T.; Lefkowitz, R. J., Seven-transmembrane receptors. *Nat Rev Mol Cell*  
582 *Biol* **2002**, *3* (9), 639-50.
- 583 (3) Weis, W. I.; Kobilka, B. K., The Molecular Basis of G Protein-Coupled Receptor Activation. *Annu*  
584 *Rev Biochem* **2018**, *87*, 897-919.
- 585 (4) Fredriksson, R.; Lagerstrom, M. C.; Lundin, L. G.; Schioth, H. B., The G-protein-coupled receptors  
586 in the human genome form five main families. Phylogenetic analysis, paralogon groups, and  
587 fingerprints. *Mol Pharmacol* **2003**, *63* (6), 1256-72.
- 588 (5) Davies, M. N.; Secker, A.; Halling-Brown, M.; Moss, D. S.; Freitas, A. A.; Timmis, J.; Clark, E.;  
589 Flower, D. R., GPCRTree: online hierarchical classification of GPCR function. *BMC Res Notes* **2008**,  
590 *1*, 67.
- 591 (6) Nordstrom, K. J.; Sallman Almen, M.; Edstam, M. M.; Fredriksson, R.; Schioth, H. B., Independent  
592 HHsearch, Needleman--Wunsch-based, and motif analyses reveal the overall hierarchy for most of the  
593 G protein-coupled receptor families. *Mol Biol Evol* **2011**, *28* (9), 2471-80.
- 594 (7) Chan, H. C. S.; Li, Y.; Dahoun, T.; Vogel, H.; Yuan, S., New Binding Sites, New Opportunities for  
595 GPCR Drug Discovery. *Trends Biochem Sci* **2019**, *44* (4), 312-330.
- 596 (8) Congreve, M.; de Graaf, C.; Swain, N. A.; Tate, C. G., Impact of GPCR Structures on Drug  
597 Discovery. *Cell* **2020**, *181* (1), 81-91.
- 598 (9) Sanchez-Reyes, O. B.; Cooke, A. L. G.; Tranter, D. B.; Rashid, D.; Eilers, M.; Reeves, P. J.; Smith,  
599 S. O., G Protein-Coupled Receptors Contain Two Conserved Packing Clusters. *Biophys J* **2017**, *112*  
600 (11), 2315-2326.
- 601 (10) Hilger, D.; Masureel, M.; Kobilka, B. K., Structure and dynamics of GPCR signaling complexes.  
602 *Nat Struct Mol Biol* **2018**, *25* (1), 4-12.
- 603 (11) Niimura, Y., Evolutionary dynamics of olfactory receptor genes in chordates: interaction between  
604 environments and genomic contents. *Hum Genomics* **2009**, *4* (2), 107-18.
- 605 (12) Olender, T.; Waszak, S. M.; Viavant, M.; Khen, M.; Ben-Asher, E.; Reyes, A.; Nativ, N.; Wysocki,  
606 C. J.; Ge, D.; Lancet, D., Personal receptor repertoires: olfaction as a model. *BMC Genomics* **2012**, *13*,  
607 414.
- 608 (13) Buck, L.; Axel, R., A novel multigene family may encode odorant receptors: a molecular basis for  
609 odor recognition. *Cell* **1991**, *65* (1), 175-87.
- 610 (14) Smith, S. O., Deconstructing the transmembrane core of class A G protein-coupled receptors.  
611 *Trends Biochem Sci* **2021**, *46* (12), 1017-1029.
- 612 (15) Malnic, B.; Godfrey, P. A.; Buck, L. B., The human olfactory receptor gene family. *Proc Natl*  
613 *Acad Sci U S A* **2004**, *101* (8), 2584-9.
- 614 (16) Glusman, G.; Bahar, A.; Sharon, D.; Pilpel, Y.; White, J.; Lancet, D., The olfactory receptor gene  
615 superfamily: data mining, classification, and nomenclature. *Mamm Genome* **2000**, *11* (11), 1016-23.
- 616 (17) Zhang, X.; Firestein, S., The olfactory receptor gene superfamily of the mouse. *Nat Neurosci* **2002**,  
617 *5* (2), 124-33.
- 618 (18) Niimura, Y.; Nei, M., Evolutionary dynamics of olfactory receptor genes in fishes and tetrapods.  
619 *Proc Natl Acad Sci U S A* **2005**, *102* (17), 6039-44.
- 620 (19) Kotthoff, M.; Bauer, J.; Haag, F.; Krautwurst, D., Conserved C-terminal motifs in odorant  
621 receptors instruct their cell surface expression and cAMP signaling. *FASEB J* **2021**, *35* (2), e21274.
- 622 (20) de March, C. A.; Kim, S. K.; Antonczak, S.; Goddard, W. A., 3rd; Golebiowski, J., G protein-  
623 coupled odorant receptors: From sequence to structure. *Protein Sci* **2015**, *24* (9), 1543-8.

- 624 (21) de March, C. A.; Yu, Y.; Ni, M. J.; Adipietro, K. A.; Matsunami, H.; Ma, M.; Golebiowski, J.,  
625 Conserved Residues Control Activation of Mammalian G Protein-Coupled Odorant Receptors. *J Am*  
626 *Chem Soc* **2015**, *137* (26), 8611-8616.
- 627 (22) Man, O.; Gilad, Y.; Lancet, D., Prediction of the odorant binding site of olfactory receptor proteins  
628 by human-mouse comparisons. *Protein Sci* **2004**, *13* (1), 240-54.
- 629 (23) Bushdid, C.; de March, C. A.; Topin, J.; Do, M.; Matsunami, H.; Golebiowski, J., Mammalian  
630 class I odorant receptors exhibit a conserved vestibular-binding pocket. *Cell Mol Life Sci* **2019**, *76* (5),  
631 995-1004.
- 632 (24) Gelis, L.; Wolf, S.; Hatt, H.; Neuhaus, E. M.; Gerwert, K., Prediction of a ligand-binding niche  
633 within a human olfactory receptor by combining site-directed mutagenesis with dynamic homology  
634 modeling. *Angew Chem Int Ed Engl* **2012**, *51* (5), 1274-8.
- 635 (25) Cong, X.; Ren, W.; Pacalon, J.; Xu, R.; Xu, L.; Li, X.; de March, C. A.; Matsunami, H.; Yu, H.;  
636 Yu, Y.; Golebiowski, J., Large-Scale G Protein-Coupled Olfactory Receptor-Ligand Pairing. *ACS*  
637 *Central Science* **2022**, *8* (3), 379-387.
- 638 (26) Chen, H.; Dadsetan, S.; Fomina, A. F.; Gong, Q., Expressing exogenous functional odorant  
639 receptors in cultured olfactory sensory neurons. *Neural development* **2008**, *3*, 22.
- 640 (27) Geithe, C.; Noe, F.; Kreissl, J.; Krautwurst, D., The Broadly Tuned Odorant Receptor OR1A1 is  
641 Highly Selective for 3-Methyl-2,4-nonanedione, a Key Food Odorant in Aged Wines, Tea, and Other  
642 Foods. *Chemical senses* **2017**, *42* (3), 181-193.
- 643 (28) Kajiya, K.; Inaki, K.; Tanaka, M.; Haga, T.; Kataoka, H.; Touhara, K., Molecular bases of odor  
644 discrimination: Reconstitution of olfactory receptors that recognize overlapping sets of odorants. *J*  
645 *Neurosci* **2001**, *21* (16), 6018-25.
- 646 (29) Malnic, B.; Hirono, J.; Sato, T.; Buck, L. B., Combinatorial receptor codes for odors. *Cell* **1999**,  
647 *96* (5), 713-23.
- 648 (30) Nara, K.; Saraiva, L. R.; Ye, X. L.; Buck, L. B., A Large-Scale Analysis of Odor Coding in the  
649 Olfactory Epithelium. *Journal of Neuroscience* **2011**, *31* (25), 9179-9191.
- 650 (31) Saito, H.; Chi, Q.; Zhuang, H.; Matsunami, H.; Mainland, J. D., Odor coding by a Mammalian  
651 receptor repertoire. *Sci Signal* **2009**, *2* (60), ra9.
- 652 (32) Adipietro, K. A.; Mainland, J. D.; Matsunami, H., Functional evolution of mammalian odorant  
653 receptors. *PLoS Genet* **2012**, *8* (7), e1002821.
- 654 (33) Mainland, J. D.; Li, Y. R.; Zhou, T.; Liu, W. L.; Matsunami, H., Human olfactory receptor  
655 responses to odorants. *Scientific data* **2015**, *2*, 150002.
- 656 (34) Noe, F.; Polster, J.; Geithe, C.; Kotthoff, M.; Schieberle, P.; Krautwurst, D., OR2M3: A Highly  
657 Specific and Narrowly Tuned Human Odorant Receptor for the Sensitive Detection of Onion Key Food  
658 Odorant 3-Mercapto-2-methylpentan-1-ol. *Chemical senses* **2017**, *42* (3), 195-210.
- 659 (35) Haag, F.; Di Pizio, A.; Krautwurst, D., The key food odorant receptive range of broadly tuned  
660 receptor OR2W1. *Food Chem* **2022**, *375*, 131680.
- 661 (36) Charlier, L.; Topin, J.; Ronin, C.; Kim, S. K.; Goddard, W. A., 3rd; Efremov, R.; Golebiowski, J.,  
662 How broadly tuned olfactory receptors equally recognize their agonists. Human OR1G1 as a test case.  
663 *Cell Mol Life Sci* **2012**, *69* (24), 4205-13.
- 664 (37) Jabeen, A.; de March, C. A.; Matsunami, H.; Ranganathan, S., Machine Learning Assisted  
665 Approach for Finding Novel High Activity Agonists of Human Ectopic Olfactory Receptors. *Int J Mol*  
666 *Sci* **2021**, *22* (21).
- 667 (38) Ballante, F.; Kooistra, A. J.; Kampen, S.; de Graaf, C.; Carlsson, J., Structure-Based Virtual  
668 Screening for Ligands of G Protein-Coupled Receptors: What Can Molecular Docking Do for You?  
669 *Pharmacol Rev* **2021**, *73* (4), 527-565.

- 670 (39) Block, E., Molecular Basis of Mammalian Odor Discrimination: A Status Report. *J Agric Food*  
671 *Chem* **2018**, *66* (51), 13346-13366.
- 672 (40) Bushdid, C.; de March, C. A.; Fiorucci, S.; Matsunami, H.; Golebiowski, J., Agonists of G-  
673 Protein-Coupled Odorant Receptors Are Predicted from Chemical Features. *J Phys Chem Lett* **2018**, *9*  
674 (9), 2235-2240.
- 675 (41) Yuan, S.; Dahoun, T.; Brugarolas, M.; Pick, H.; Filipek, S.; Vogel, H., Computational modeling  
676 of the olfactory receptor Olfr73 suggests a molecular basis for low potency of olfactory receptor-  
677 activating compounds. *Commun Biol* **2019**, *2*, 141.
- 678 (42) Haag, F.; Ahmed, L.; Reiss, K.; Block, E.; Batista, V. S.; Krautwurst, D., Copper-mediated thiol  
679 potentiation and mutagenesis-guided modeling suggest a highly conserved copper-binding motif in  
680 human OR2M3. *Cell Mol Life Sci* **2019**.
- 681 (43) Cong, X.; Ren, W.; Pacalon, J.; Xu, R.; Xu, L.; Li, X.; de March, C. A.; Matsunami, H.; Yu, H.;  
682 Yu, Y.; Golebiowski, J., Large-Scale G Protein-Coupled Olfactory Receptor–Ligand Pairing. *ACS*  
683 *Central Science* **2022**.
- 684 (44) Hameduh, T.; Haddad, Y.; Adam, V.; Heger, Z., Homology modeling in the time of collective and  
685 artificial intelligence. *Comput Struct Biotechnol J* **2020**, *18*, 3494-3506.
- 686 (45) Akdel, M.; Pires, D. E. V.; Porta Pardo, E.; Jänes, J.; Zalevsky, A. O.; Mészáros, B.; Bryant, P.;  
687 Good, L. L.; Laskowski, R. A.; Pozzati, G.; Shenoy, A.; Zhu, W.; Kundrotas, P.; Ruiz Serra, V.;  
688 Rodrigues, C. H. M.; Dunham, A. S.; Burke, D.; Borkakoti, N.; Velankar, S.; Frost, A.; Lindorff-Larsen,  
689 K.; Valencia, A.; Ovchinnikov, S.; Durairaj, J.; Ascher, D. B.; Thornton, J. M.; Davey, N. E.; Stein, A.;  
690 Elofsson, A.; Croll, T. I.; Beltrao, P., **2021**.
- 691 (46) Baek, M.; DiMaio, F.; Anishchenko, I.; Dauparas, J.; Ovchinnikov, S.; Lee, G. R.; Wang, J.; Cong,  
692 Q.; Kinch, L. N.; Schaeffer, R. D.; Millan, C.; Park, H.; Adams, C.; Glassman, C. R.; DeGiovanni, A.;  
693 Pereira, J. H.; Rodrigues, A. V.; van Dijk, A. A.; Ebrecht, A. C.; Opperman, D. J.; Sagmeister, T.;  
694 Buhlheller, C.; Pavkov-Keller, T.; Rathinaswamy, M. K.; Dalwadi, U.; Yip, C. K.; Burke, J. E.; Garcia,  
695 K. C.; Grishin, N. V.; Adams, P. D.; Read, R. J.; Baker, D., Accurate prediction of protein structures  
696 and interactions using a three-track neural network. *Science* **2021**, *373* (6557), 871-876.
- 697 (47) Jumper, J.; Evans, R.; Pritzel, A.; Green, T.; Figurnov, M.; Ronneberger, O.; Tunyasuvunakool,  
698 K.; Bates, R.; Zidek, A.; Potapenko, A.; Bridgland, A.; Meyer, C.; Kohl, S. A. A.; Ballard, A. J.; Cowie,  
699 A.; Romera-Paredes, B.; Nikolov, S.; Jain, R.; Adler, J.; Back, T.; Petersen, S.; Reiman, D.; Clancy, E.;  
700 Zielinski, M.; Steinegger, M.; Pacholska, M.; Berghammer, T.; Bodenstein, S.; Silver, D.; Vinyals, O.;  
701 Senior, A. W.; Kavukcuoglu, K.; Kohli, P.; Hassabis, D., Highly accurate protein structure prediction  
702 with AlphaFold. *Nature* **2021**, *596* (7873), 583-589.
- 703 (48) Varadi, M.; Anyango, S.; Deshpande, M.; Nair, S.; Natassia, C.; Yordanova, G.; Yuan, D.; Stroe,  
704 O.; Wood, G.; Laydon, A.; Zidek, A.; Green, T.; Tunyasuvunakool, K.; Petersen, S.; Jumper, J.; Clancy,  
705 E.; Green, R.; Vora, A.; Lutfi, M.; Figurnov, M.; Cowie, A.; Hobbs, N.; Kohli, P.; Kleywegt, G.; Birney,  
706 E.; Hassabis, D.; Velankar, S., AlphaFold Protein Structure Database: massively expanding the  
707 structural coverage of protein-sequence space with high-accuracy models. *Nucleic Acids Res* **2022**, *50*  
708 (D1), D439-D444.
- 709 (49) Tunyasuvunakool, K.; Adler, J.; Wu, Z.; Green, T.; Zielinski, M.; Zidek, A.; Bridgland, A.; Cowie,  
710 A.; Meyer, C.; Laydon, A.; Velankar, S.; Kleywegt, G. J.; Bateman, A.; Evans, R.; Pritzel, A.; Figurnov,  
711 M.; Ronneberger, O.; Bates, R.; Kohl, S. A. A.; Potapenko, A.; Ballard, A. J.; Romera-Paredes, B.;  
712 Nikolov, S.; Jain, R.; Clancy, E.; Reiman, D.; Petersen, S.; Senior, A. W.; Kavukcuoglu, K.; Birney, E.;  
713 Kohli, P.; Jumper, J.; Hassabis, D., Highly accurate protein structure prediction for the human proteome.  
714 *Nature* **2021**, *596* (7873), 590-596.
- 715 (50) Marcinek, P.; Haag, F.; Geithe, C.; Krautwurst, D., An evolutionary conserved olfactory receptor  
716 for foodborne and semiochemical alkylpyrazines. *FASEB J* **2021**, *35* (6), e21638.



- 717 (51) Migita, K.; Iiduka, T.; Tsukamoto, K.; Sugiura, S.; Tanaka, G.; Sakamaki, G.; Yamamoto, Y.;  
718 Takeshige, Y.; Miyazawa, T.; Kojima, A.; Nakatake, T.; Okitani, A.; Matsuishi, M., Retort beef aroma  
719 that gives preferable properties to canned beef products and its aroma components. *Anim Sci J* **2017**, *88*  
720 (12), 2050-2056.
- 721 (52) Hou, L.; Zhang, Y.; Wang, X., Characterization of the Volatile Compounds and Taste Attributes  
722 of Sesame Pastes Processed at Different Temperatures. *J Oleo Sci* **2019**, *68* (6), 551-558.
- 723 (53) Henning, C.; Glomb, M. A., Pathways of the Maillard reaction under physiological conditions.  
724 *Glycoconj J* **2016**, *33* (4), 499-512.
- 725 (54) Bohman, B.; Phillips, R. D.; Menz, M. H.; Berntsson, B. W.; Flematti, G. R.; Barrow, R. A.;  
726 Dixon, K. W.; Peakall, R., Discovery of pyrazines as pollinator sex pheromones and orchid  
727 semiochemicals: implications for the evolution of sexual deception. *New Phytol* **2014**, *203* (3), 939-52.
- 728 (55) Silva-Junior, E. A.; Ruzzini, A. C.; Paludo, C. R.; Nascimento, F. S.; Currie, C. R.; Clardy, J.;  
729 Pupo, M. T., Pyrazines from bacteria and ants: convergent chemistry within an ecological niche. *Sci Rep*  
730 **2018**, *8* (1), 2595.
- 731 (56) Osada, K.; Kurihara, K.; Izumi, H.; Kashiwayanagi, M., Pyrazine analogues are active components  
732 of wolf urine that induce avoidance and freezing behaviours in mice. *PLoS One* **2013**, *8* (4), e61753.
- 733 (57) Osada, K.; Miyazono, S.; Kashiwayanagi, M., The scent of wolves: pyrazine analogs induce  
734 avoidance and vigilance behaviors in prey. *Front Neurosci* **2015**, *9*, 363.
- 735 (58) Osada, K.; Miyazono, S.; Kashiwayanagi, M., Structure-Activity Relationships of Alkylpyrazine  
736 Analogs and Fear-Associated Behaviors in Mice. *J Chem Ecol* **2017**, *43* (3), 263-272.
- 737 (59) Regnier, F. E., Semiochemical--structure and function. *Biol Reprod* **1971**, *4* (3), 309-26.
- 738 (60) Di Pizio, A.; Niv, M. Y., Computational Studies of Smell and Taste Receptors. *Israel Journal of*  
739 *Chemistry* **2014**, *54* (8-9), 1205-1218.
- 740 (61) Forrest, L. R.; Tang, C. L.; Honig, B., On the accuracy of homology modeling and sequence  
741 alignment methods applied to membrane proteins. *Biophys J* **2006**, *91* (2), 508-17.
- 742 (62) de March, C. A.; Topin, J.; Bruguera, E.; Novikov, G.; Ikegami, K.; Matsunami, H.; Golebiowski,  
743 J., Odorant Receptor 7D4 Activation Dynamics. *Angew Chem Int Ed Engl* **2018**, *57* (17), 4554-4558.
- 744 (63) Nicoli, A.; Dunkel, A.; Giorgino, T.; de Graaf, C.; Di Pizio, A., Classification Model for the  
745 Second Extracellular Loop of Class A GPCRs. *J Chem Inf Model* **2022**, *62* (3), 511-522.
- 746 (64) Yu, Y.; Pacalon, J.; Ma, Z.; Xu, L.; Belloir, C.; Topin, J.; Briand, L.; Golebiowski, J.; Cong, X.,  
747 **2021**.
- 748 (65) Woolley, M. J.; Conner, A. C., Understanding the common themes and diverse roles of the second  
749 extracellular loop (ECL2) of the GPCR super-family. *Mol Cell Endocrinol* **2017**, *449*, 3-11.
- 750 (66) Wink, L. H.; Baker, D. L.; Cole, J. A.; Parrill, A. L., A benchmark study of loop modeling methods  
751 applied to G protein-coupled receptors. *J Comput Aided Mol Des* **2019**, *33* (6), 573-595.
- 752 (67) Won, J.; Lee, G. R.; Park, H.; Seok, C., GalaxyGPCRloop: Template-Based and Ab Initio  
753 Structure Sampling of the Extracellular Loops of G-Protein-Coupled Receptors. *J Chem Inf Model* **2018**,  
754 *58* (6), 1234-1243.
- 755 (68) Binder, J. L.; Berendzen, J.; Stevens, A. O.; He, Y.; Wang, J.; Dokholyan, N. V.; Oprea, T. I.,  
756 AlphaFold illuminates half of the dark human proteins. *Curr Opin Struct Biol* **2022**, *74*, 102372.
- 757 (69) Ibrahim, P.; Wifling, D.; Clark, T., Universal Activation Index for Class A GPCRs. *J Chem Inf*  
758 *Model* **2019**, *59* (9), 3938-3945.
- 759 (70) Di Pizio, A.; Waterloo, L. A. W.; Brox, R.; Lober, S.; Weikert, D.; Behrens, M.; Gmeiner, P.; Niv,  
760 M. Y., Rational design of agonists for bitter taste receptor TAS2R14: from modeling to bench and back.  
761 *Cell Mol Life Sci* **2020**, *77* (3), 531-542.

- 762 (71) Bender, B. J.; Gahbauer, S.; Lutten, A.; Lyu, J.; Webb, C. M.; Stein, R. M.; Fink, E. A.; Balias,  
763 T. E.; Carlsson, J.; Irwin, J. J.; Shoichet, B. K., A practical guide to large-scale docking. *Nat Protoc*  
764 **2021**, *16* (10), 4799-4832.
- 765 (72) Halgren, T. A., Identifying and characterizing binding sites and assessing druggability. *J Chem*  
766 *Inf Model* **2009**, *49* (2), 377-89.
- 767 (73) Halgren, T., New method for fast and accurate binding-site identification and analysis. *Chem Biol*  
768 *Drug Des* **2007**, *69* (2), 146-8.
- 769 (74) Sherman, W.; Beard, H. S.; Farid, R., Use of an induced fit receptor structure in virtual screening.  
770 *Chem Biol Drug Des* **2006**, *67* (1), 83-4.
- 771 (75) Di Pizio, A.; Behrens, M.; Krautwurst, D., Beyond the Flavour: The Potential Druggability of  
772 Chemosensory G Protein-Coupled Receptors. *Int J Mol Sci* **2019**, *20* (6).
- 773 (76) Man, O.; Gilad, Y.; Lancet, D., Prediction of the odorant binding site of olfactory receptor proteins  
774 by human-mouse comparisons. *Protein Sci* **2004**, *13* (1), 240-54.
- 775 (77) Abaffy, T.; Malhotra, A.; Luetje, C. W., The molecular basis for ligand specificity in a mouse  
776 olfactory receptor: a network of functionally important residues. *J Biol Chem* **2007**, *282* (2), 1216-24.
- 777 (78) Ahmed, L.; Zhang, Y.; Block, E.; Buehl, M.; Corr, M. J.; Cormanich, R. A.; Gundala, S.;  
778 Matsunami, H.; O'Hagan, D.; Ozbil, M.; Pan, Y.; Sekharan, S.; Ten, N.; Wang, M.; Yang, M.; Zhang,  
779 Q.; Zhang, R.; Batista, V. S.; Zhuang, H., Molecular mechanism of activation of human musk receptors  
780 OR5AN1 and OR1A1 by (R)-muscone and diverse other musk-smelling compounds. *Proc Natl Acad*  
781 *Sci U S A* **2018**, *115* (17), E3950-E3958.
- 782 (79) Baud, O.; Etter, S.; Spreafico, M.; Bordoli, L.; Schwede, T.; Vogel, H.; Pick, H., The mouse  
783 eugenol odorant receptor: structural and functional plasticity of a broadly tuned odorant binding pocket.  
784 *Biochemistry* **2011**, *50* (5), 843-53.
- 785 (80) Baud, O.; Yuan, S.; Veya, L.; Filipek, S.; Vogel, H.; Pick, H., Exchanging ligand-binding  
786 specificity between a pair of mouse olfactory receptor paralogs reveals odorant recognition principles.  
787 *Sci Rep* **2015**, *5*, 14948.
- 788 (81) de March, C. A.; Yu, Y.; Ni, M. J.; Adipietro, K. A.; Matsunami, H.; Ma, M.; Golebiowski, J.,  
789 Conserved Residues Control Activation of Mammalian G Protein-Coupled Odorant Receptors. *Journal*  
790 *of the American Chemical Society* **2015**, *137* (26), 8611-6.
- 791 (82) Katada, S.; Hirokawa, T.; Oka, Y.; Suwa, M.; Touhara, K., Structural basis for a broad but  
792 selective ligand spectrum of a mouse olfactory receptor: mapping the odorant-binding site. *J Neurosci*  
793 **2005**, *25* (7), 1806-15.
- 794 (83) Di Pizio, A.; Shy, N.; Behrens, M.; Meyerhof, W.; Niv, M. Y., Molecular Features Underlying  
795 Selectivity in Chicken Bitter Taste Receptors. *Front Mol Biosci* **2018**, *5*, 6.
- 796 (84) Dunkel, A.; Hofmann, T.; Di Pizio, A., In Silico Investigation of Bitter Hop-Derived Compounds  
797 and Their Cognate Bitter Taste Receptors. *J Agric Food Chem* **2020**, *68* (38), 10414-10423.
- 798 (85) Heo, L.; Feig, M., Multi-State Modeling of G-protein Coupled Receptors at Experimental  
799 Accuracy. **2022**.
- 800 (86) Czerny, M.; Wagner, R.; Grosch, W., Detection of Odor-Active Ethenylalkylpyrazines in Roasted  
801 Coffee. *Journal of Agricultural and Food Chemistry* **1996**, *44* (10), 3268-3272.
- 802 (87) Frank, O.; Kreissl, J. K.; Daschner, A.; Hofmann, T., Accurate determination of reference  
803 materials and natural isolates by means of quantitative (1)h NMR spectroscopy. *J Agric Food Chem*  
804 **2014**, *62* (12), 2506-15.
- 805 (88) Porcelli, C.; Kreissl, J.; Steinhaus, M., Enantioselective synthesis of tri-deuterated (-)-geosmin to  
806 be used as internal standard in quantitation assays. *J Labelled Comp Radiopharm* **2020**, *63* (11), 476-  
807 481.

- 808 (89) Noe, F.; Frey, T.; Fiedler, J.; Geithe, C.; Nowak, B.; Krautwurst, D., IL-6-HaloTag((R)) enables  
809 live-cell plasma membrane staining, flow cytometry, functional expression, and de-orphaning of  
810 recombinant odorant receptors. *J Biol Methods* **2017**, *4* (4), e81.
- 811 (90) Noe, F.; Geithe, C.; Fiedler, J.; Krautwurst, D., A bi-functional IL-6-HaloTag((R)) as a tool to  
812 measure the cell-surface expression of recombinant odorant receptors and to facilitate their activity  
813 quantification. *J Biol Methods* **2017**, *4* (4), e82.
- 814 (91) Graham, F. L.; Smiley, J.; Russell, W. C.; Nairn, R., Characteristics of a human cell line  
815 transformed by DNA from human adenovirus type 5. *J Gen Virol* **1977**, *36* (1), 59-74.
- 816 (92) Geithe, C.; Andersen, G.; Malki, A.; Krautwurst, D., A Butter Aroma Recombinate Activates  
817 Human Class-I Odorant Receptors. *J Agric Food Chem* **2015**, *63* (43), 9410-20.
- 818 (93) Saito, H.; Kubota, M.; Roberts, R. W.; Chi, Q.; Matsunami, H., RTP family members induce  
819 functional expression of mammalian odorant receptors. *Cell* **2004**, *119* (5), 679-91.
- 820 (94) Shirokova, E.; Schmiedeberg, K.; Bedner, P.; Niessen, H.; Willecke, K.; Raguse, J. D.; Meyerhof,  
821 W.; Krautwurst, D., Identification of specific ligands for orphan olfactory receptors. G protein-  
822 dependent agonism and antagonism of odorants. *J Biol Chem* **2005**, *280* (12), 11807-15.
- 823 (95) Jones, D. T.; Reed, R. R., Golf: an olfactory neuron specific-G protein involved in odorant signal  
824 transduction. *Science* **1989**, *244* (4906), 790-5.
- 825 (96) Li, F.; Ponissery-Saidu, S.; Yee, K. K.; Wang, H.; Chen, M. L.; Iguchi, N.; Zhang, G.; Jiang, P.;  
826 Reisert, J.; Huang, L., Heterotrimeric G protein subunit Ggamma13 is critical to olfaction. *J Neurosci*  
827 **2013**, *33* (18), 7975-84.
- 828 (97) Binkowski, B.; Fan, F.; Wood, K., Engineered luciferases for molecular sensing in living cells.  
829 *Curr Opin Biotechnol* **2009**, *20* (1), 14-8.
- 830 (98) DeLean, A.; Munson, P. J.; Rodbard, D., Simultaneous analysis of families of sigmoidal curves:  
831 application to bioassay, radioligand assay, and physiological dose-response curves. *Am J Physiol* **1978**,  
832 *235* (2), E97-102.
- 833 (99) NCBI Resource Coordinators, Database Resources of the National Center for Biotechnology  
834 Information. *Nucleic Acids Research* **2017**, *45* (Database issue), D12-D17.
- 835 (100) Kumar, S.; Stecher, G.; Li, M.; Nnyaz, C.; Tamura, K., MEGA X: Molecular Evolutionary  
836 Genetics Analysis across Computing Platforms. *Molecular Biology and Evolution* **2018**, *35* (6), 1547-  
837 1549.
- 838 (101) Thompson, J. D.; Higgins, D. G.; Gibson, T. J., CLUSTAL W: improving the sensitivity of  
839 progressive multiple sequence alignment through sequence weighting, position-specific gap penalties  
840 and weight matrix choice. *Nucleic Acids Res* **1994**, *22* (22), 4673-80.
- 841 (102) Saitou, N.; Nei, M., The neighbor-joining method: a new method for reconstructing phylogenetic  
842 trees. *Mol Biol Evol* **1987**, *4* (4), 406-25.
- 843 (103) Felsenstein, J., Confidence limits on phylogenies: An approach using the bootstrap. *Evolution*  
844 **1985**, *39*, 783-791.
- 845 (104) Zuckerkandl, E.; Pauling, L., *Evolutionary divergence and convergence in proteins*. 1965; p 97-  
846 166.
- 847 (105) Kooistra, A. J.; Mordalski, S.; Pandey-Szekeres, G.; Esguerra, M.; Mamyrbekov, A.; Munk, C.;  
848 Keseru, G. M.; Gloriam, D. E., GPCRdb in 2021: integrating GPCR sequence, structure and function.  
849 *Nucleic Acids Res* **2021**, *49* (D1), D335-D343.
- 850 (106) Eswar, N.; Webb, B.; Marti-Renom, M. A.; Madhusudhan, M. S.; Eramian, D.; Shen, M. Y.;  
851 Pieper, U.; Sali, A., Comparative protein structure modeling using Modeller. *Curr Protoc*  
852 *Bioinformatics* **2006**, *Chapter 5*, Unit-5 6.
- 853 (107) Friesner, R. A.; Banks, J. L.; Murphy, R. B.; Halgren, T. A.; Klicic, J. J.; Mainz, D. T.; Repasky,  
854 M. P.; Knoll, E. H.; Shelley, M.; Perry, J. K.; Shaw, D. E.; Francis, P.; Shenkin, P. S., Glide: a new

- 855 approach for rapid, accurate docking and scoring. 1. Method and assessment of docking accuracy. *J Med*  
856 *Chem* **2004**, *47* (7), 1739-49.
- 857 (108) Friesner, R. A.; Murphy, R. B.; Repasky, M. P.; Frye, L. L.; Greenwood, J. R.; Halgren, T. A.;  
858 Sanschagrin, P. C.; Mainz, D. T., Extra precision glide: docking and scoring incorporating a model of  
859 hydrophobic enclosure for protein-ligand complexes. *J Med Chem* **2006**, *49* (21), 6177-96.
- 860 (109) Pedregosa, F. a. V., G. and Gramfort, A. and Michel, V., Thirion, B. and Grisel, O., Blondel, M.,  
861 Prettenhofer, P., Weiss, R. and Dubourg, V., Vanderplas, J., Passos, A., Cournapeau, D., Brucher, M.,  
862 Perrot, M., Duchesnay, E., Scikit-learn: Machine Learning in Python. *Journal of Machine Learning*  
863 *Research* **2011**, *12*, 2825-2830.
- 864 (110) Hunter, J. D., Matplotlib: A 2D Graphics Environment. *Computing in Science & Engineering*  
865 **2007**, *9* (3), 90-95.
- 866 (111) Sherman, W.; Day, T.; Jacobson, M. P.; Friesner, R. A.; Farid, R., Novel procedure for modeling  
867 ligand/receptor induced fit effects. *J Med Chem* **2006**, *49* (2), 534-53.
- 868 (112) consortium, P., Promoting transparency and reproducibility in enhanced molecular simulations.  
869 *Nat Methods* **2019**, *16* (8), 670-673.
- 870 (113) Tribello, G. A.; Bonomi, M.; Branduardi, D.; Camilloni, C.; Bussi, G., PLUMED 2: New feathers  
871 for an old bird. *Computer Physics Communications* **2014**, *185* (2), 604-613.
- 872 (114) Bonomi, M.; Branduardi, D.; Bussi, G.; Camilloni, C.; Provasi, D.; Raiteri, P.; Donadio, D.;  
873 Marinelli, F.; Pietrucci, F.; Broglia, R. A.; Parrinello, M., PLUMED: A portable plugin for free-energy  
874 calculations with molecular dynamics. *Computer Physics Communications* **2009**, *180* (10), 1961-1972.
- 875 (115) Pettersen, E. F.; Goddard, T. D.; Huang, C. C.; Meng, E. C.; Couch, G. S.; Croll, T. I.; Morris,  
876 J. H.; Ferrin, T. E., UCSF ChimeraX: Structure visualization for researchers, educators, and developers.  
877 *Protein Science* **2020**, *30* (1), 70-82.

878
