# Supplementary material for: Modeling the Orthosteric Binding Site of the G Protein-Coupled Odorant Receptor OR5K1
Source: bioRxiv or medRxiv preprint supplement (doi:10.1101/2022.06.01.494157), 2022-12-07
Supplement: Supplementary file [file media-1.pdf]

## Supporting Information

### Modeling the Orthosteric Binding Site of the G Protein-Coupled Odorant Receptor OR5K1

*Alessandro Nicoli,<sup>1‡</sup> Franziska Haag,<sup>‡1</sup> Patrick Marcinek,<sup>1</sup> Ruiming He,<sup>1,2</sup> Johanna Kreißl,<sup>1</sup>  
Jörg Stein,<sup>1</sup> Alessandro Marchetto,<sup>3,4</sup> Andreas Dunkel,<sup>1</sup> Thomas Hofmann,<sup>5</sup> Dietmar  
Krautwurst,<sup>1\*</sup> Antonella Di Pizio<sup>1\*</sup>*

<sup>1</sup> Leibniz Institute for Food Systems Biology at the Technical University of Munich, 85354  
Freising, Germany

<sup>2</sup> Department of Chemistry, Technical University of Munich, D-85748 Garching

<sup>3</sup> Institute for Advanced Simulations (IAS)-5/Institute for Neuroscience and Medicine (INM)-  
9, Forschungszentrum Jülich, 52428 Jülich, Germany

<sup>4</sup> Faculty of Mathematics, Computer Science and Natural Sciences, RWTH Aachen University,  
52062 Aachen, Germany

<sup>5</sup> Chair of Food Chemistry and Molecular Sensory Science, Technical University of Munich,  
85354 Freising, Germany.

\* Correspondence:

a.dipizio.leibniz-lsb@tum.de; Tel.: +49 8161716516

d.krautwurst.leibniz-lsb@tum.de; Tel.: +49 8161712634

**Figure S1.** Multiple Sequence Alignment of OR5K1 (residues 20-292) to  $\beta$ 2-adrenergic receptor (PDB ID: 6MXT), A2A receptor (PDB ID: 2YDV), Rhodopsin receptor (PDB ID: 4X1H), and CXCR4 receptor (PDB ID: 3ODU).

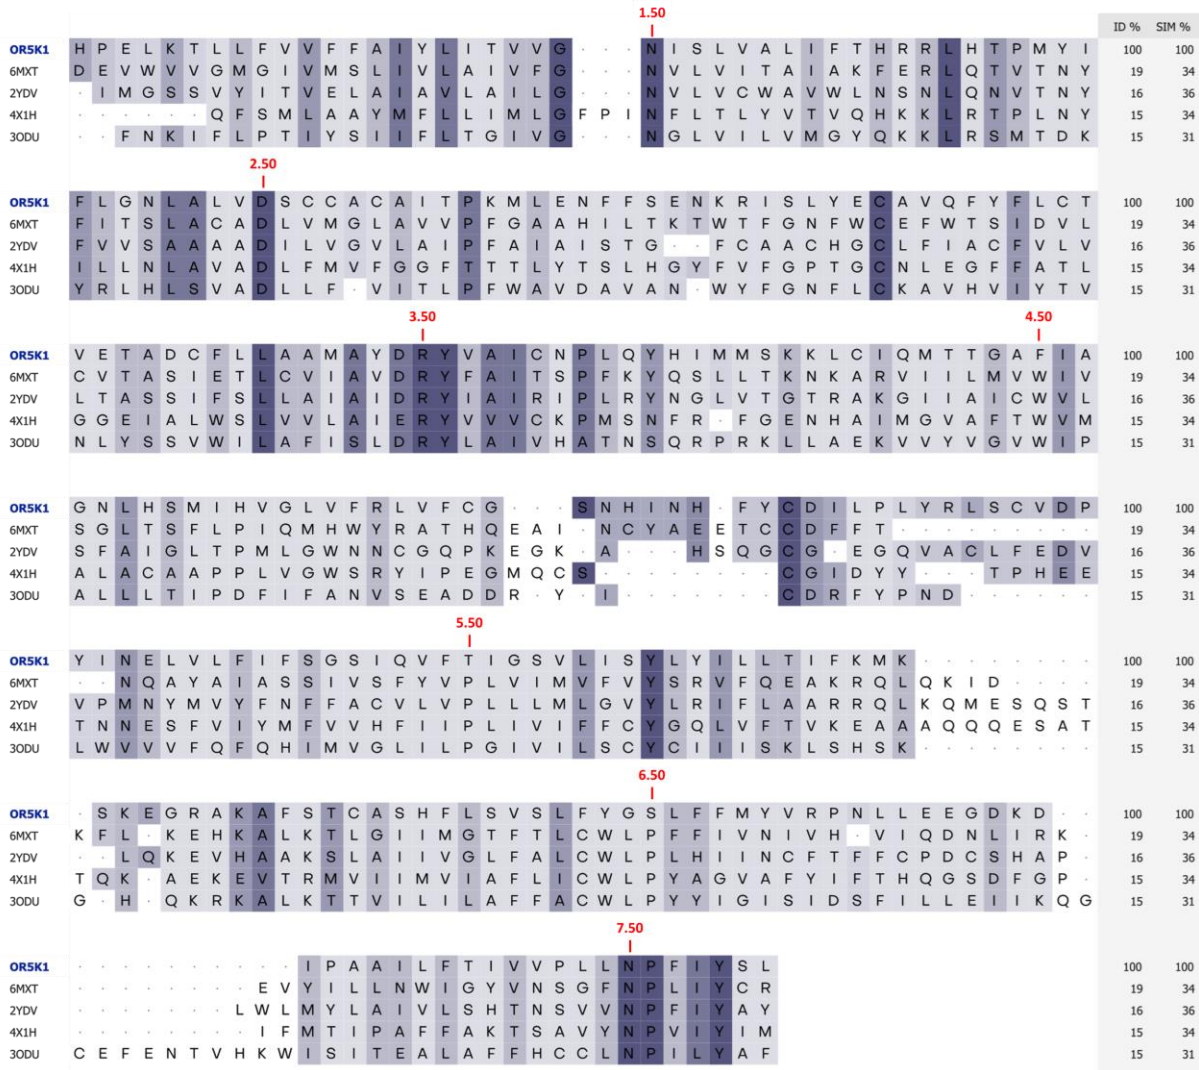

**Figure S2. (a)** Length of ECL2 for OR5K1 and experimental class A GPCRs. **(b)** Sequence Alignment of OR5K1 ECL2 region (S157<sup>4.57</sup>-L188<sup>5.37</sup>) to templates used for its modeling: NPY2 (PDB ID: 7DDZ) and CCK1 (PDB ID: 7MBY) before-Cys<sup>45.50</sup> segment and Apelin (PDB ID: 6KNM) after-Cys<sup>45.50</sup> segment.

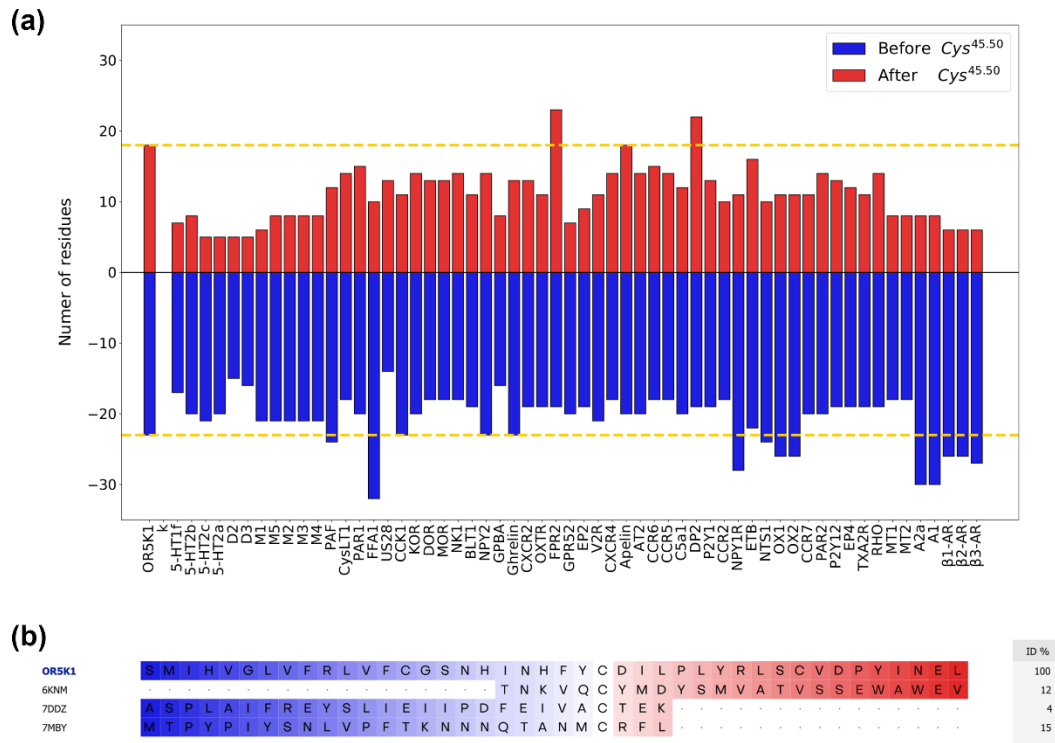

**Figure S3. OR5K1 models built with AlphaFold 2 (a) and homology modeling (b).** Alphafold2 model (AF2) is colored by pLDDT confidence score, while OR5K1 model predicted with homology modeling (HM) is colored by templates coverage.

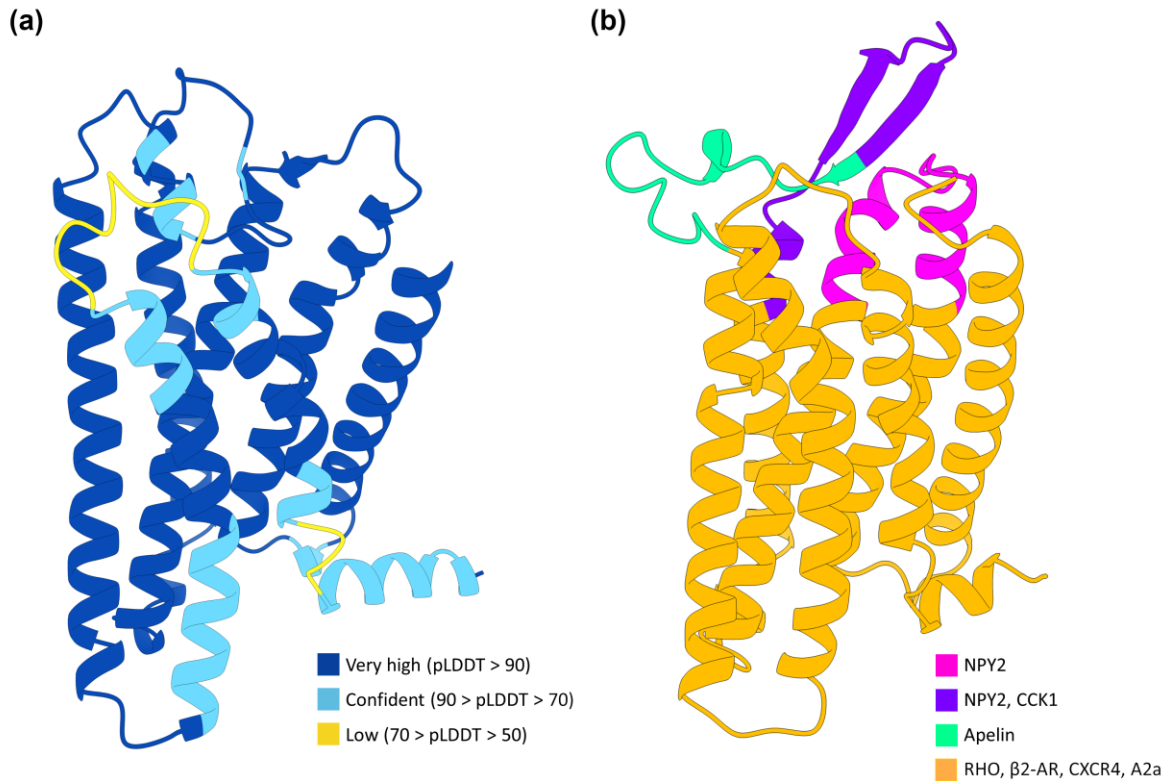

**Figure S4. ROC analysis of the starting OR5K1 AF2 and HM models.** ROC curves plot the rate of true positives (TPR) against false positives (FPR). ROC curves are colored in blue for the AF2 model and orange for HM.

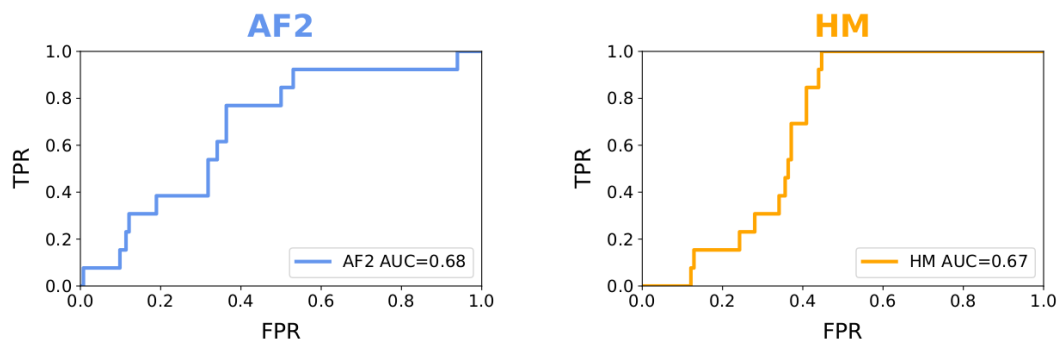

**Figure S5. (a)** ROC analysis of the OR5K1 AF2 and HM models after the first IFD simulation round. **(b)** Predicted binding modes of compound **1** within the OR5K1 binding site refined after the first IFD simulation round from AF2 and HM models.

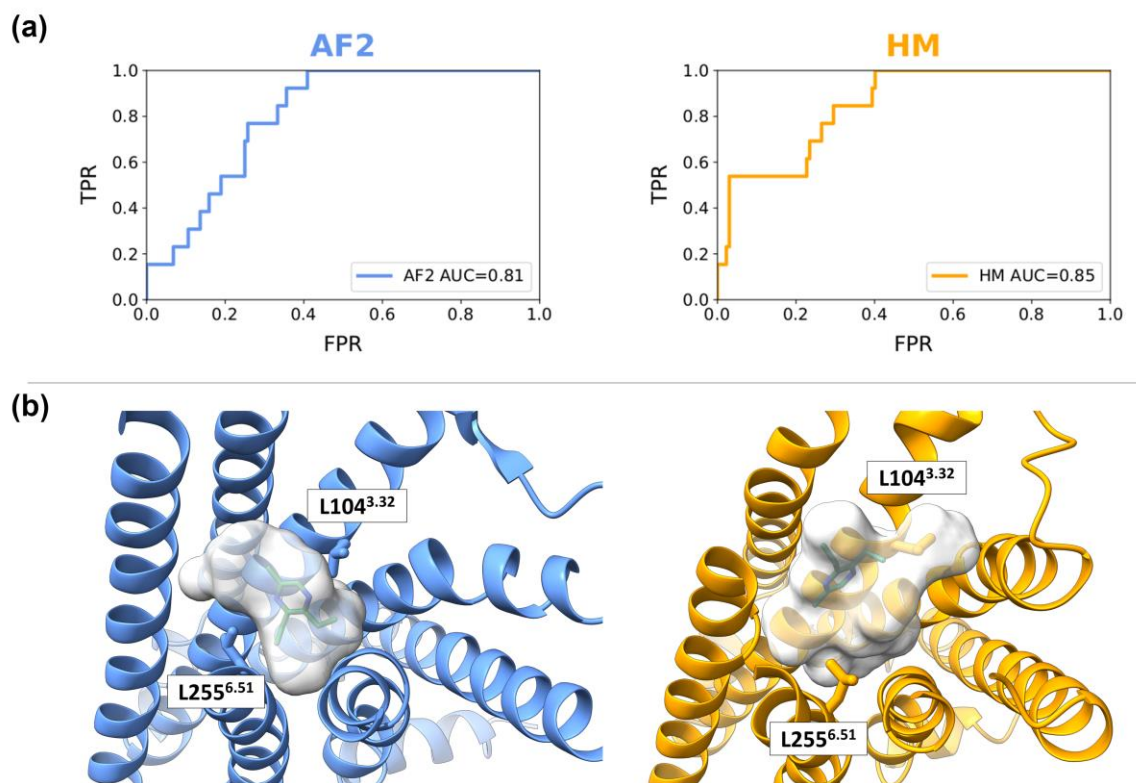

**Figure S6.** Distribution of the clusters binding poses of compound **1** in proximity to L104<sup>3.32</sup> and L255<sup>6.51</sup>.

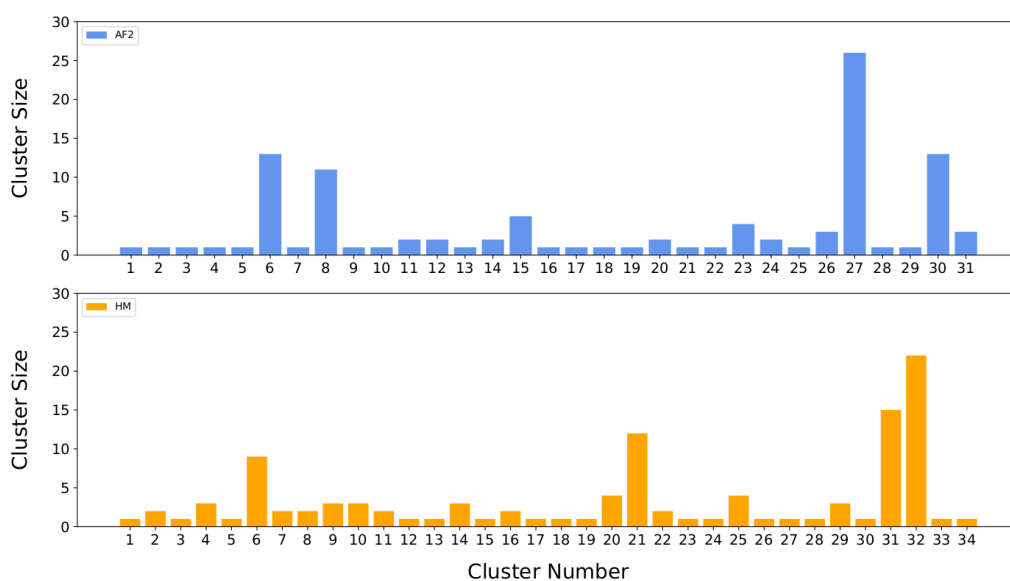

**Figure S7. Leucine residues L104<sup>3.32</sup> and L255<sup>6.51</sup> are highly conserved in OR5K1 homologs.** Circular, phylogenetic relationship of OR5K1 homologs with human rhodopsin as outgroup. Marked in purple is the species with an amino acid exchange at both conserved leucines. Highlighted in blue are the species with an amino acid exchange at L255<sup>6.51</sup>. *Homo sapiens* OR5K1 is highlighted in red.

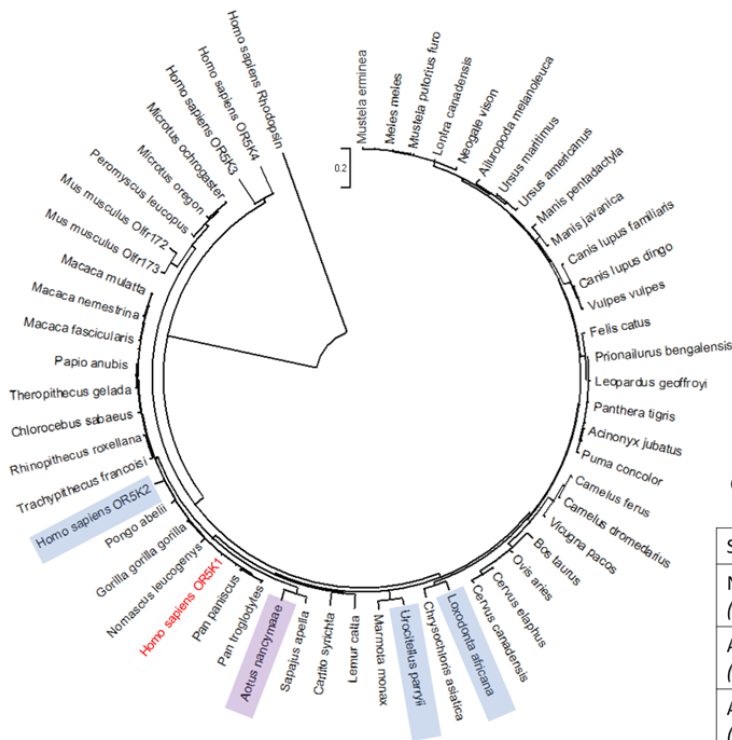

**Conservative changes at pyrazine-binding leucins in OR5K1 homologs**

| Species                                               | L104 <sup>3.32</sup> | L255 <sup>6.51</sup> |
|-------------------------------------------------------|----------------------|----------------------|
| Nancy Ma's night monkey ( <i>Aotus nancymae</i> )     | Ile                  | Ile                  |
| African elephant ( <i>Loxodonta africana</i> )        |                      | Ile                  |
| Arctic ground squirrel ( <i>Urocitellus parryii</i> ) |                      | Ile                  |
| OR5K2 ( <i>Homo sapiens</i> )                         |                      | Ile                  |

**Figure S8.** Heat maps representing the pairwise all atom RMSD matrices for the orthosteric binding site of the best performing models obtained after clustering IFD3 models. Matrices on the left refer to binding site residues, while matrices on the right include ligand coordinates in the selection of atoms for RMSD calculation. **(a)** Models from AF2. Cells are colored from dark orange to white according to increased RMSD values. Residues defining the binding site are: 104, 105, 108, 159, 199, 202, 206, 255, 256, 276, 279, 280. **(b)** Models from HM. Cells are colored from dark blue to white according to increased RMSD values. Residues defining the binding site are: 101, 104, 105, 108, 178, 180, 181, 199, 255, 258, 259, 275, 278, 279.

Models from IFD3 are available at [https://github.com/dipizio/OR5K1\\_binding\\_site](https://github.com/dipizio/OR5K1_binding_site)

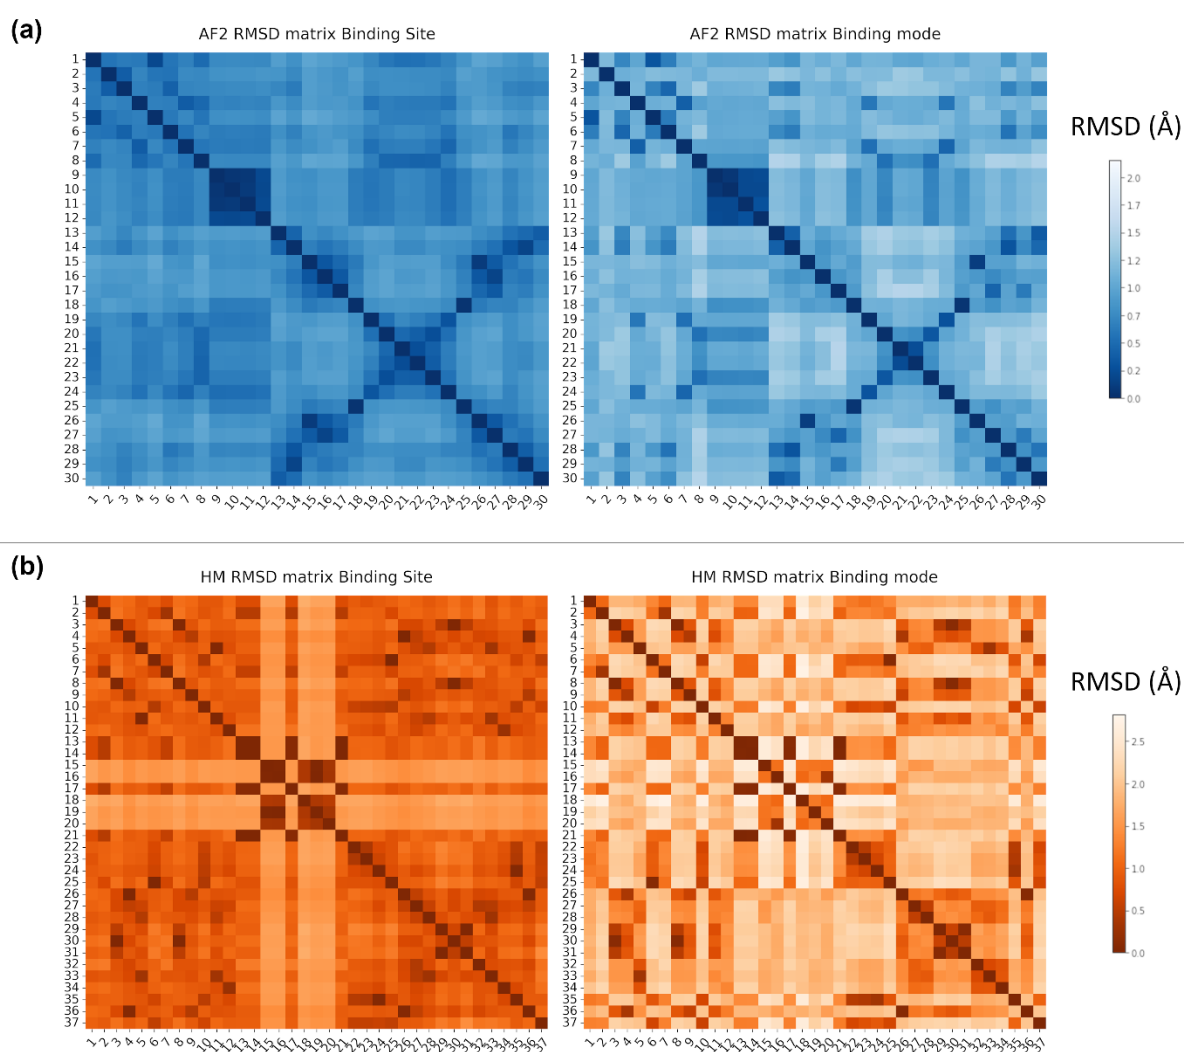

**Table S1. Models from IFD1 and IFD2 with  $d < 0.4$ , AUC  $> 0.8$ .** Model names indicate if the model is resulting from the refinement of HM or AF2 models and if it is resulting from the first (IFD1) or second (IFD2) simulation round. We report AUC and EF<sub>15%</sub> values, as well as information about the clustering and predicted van der Waals (vdW, kcal/mol) contribution of L104 and L255 to the binding of compound 1.

| Model        | AUC   | EF <sub>15%</sub> | d (nm) | Cluster | Cluster Size | vdW L104 <sup>3,32</sup> | vdW L255 <sup>6,51</sup> |
|--------------|-------|-------------------|--------|---------|--------------|--------------------------|--------------------------|
| HM_IFD2_36   | 0.901 | 0.615             | 0.278  | 4       | 3            | -2.801                   | -1.379                   |
| HM_IFD2_1    | 0.872 | 0.400             | 0.273  | 5       | 1            | -2.477                   | -0.697                   |
| HM_IFD2_5    | 0.810 | 0.313             | 0.197  | 6       | 9            | -3.376                   | -0.955                   |
| HM_IFD2_56   | 0.834 | 0.313             | 0.281  | 8       | 2            | -2.295                   | -0.768                   |
| HM_IFD2_21   | 0.869 | 0.500             | 0.38   | 11      | 2            | -1.58                    | -0.657                   |
| HM_IFD2_20   | 0.921 | 0.909             | 0.31   | 20      | 4            | -0.329                   | -2.36                    |
| HM_IFD2_18   | 0.902 | 0.615             | 0.283  | 21      | 12           | -1.698                   | -1.562                   |
| HM_IFD2_23   | 0.864 | 0.400             | 0.391  | 23      | 1            | -1.903                   | -0.385                   |
| HM_IFD1_14   | 0.914 | 0.615             | 0.345  | 31      | 15           | -0.273                   | -1.439                   |
| HM_IFD1_3    | 0.864 | 0.615             | 0.33   | 32      | 22           | -0.221                   | -1.734                   |
| HM_IFD1_11   | 0.837 | 0.211             | 0.26   | 33      | 1            | -0.183                   | -2.274                   |
| HM_IFD1_13   | 0.855 | 0.615             | 0.399  | 34      | 1            | -0.125                   | -1.503                   |
| AF2_IFD2_120 | 0.833 | 0.235             | 0.285  | 8       | 11           | -2.477                   | -0.697                   |
| AF2_IFD2_105 | 0.883 | 0.538             | 0.356  | 15      | 5            | -1.036                   | -1.246                   |
| AF2_IFD2_55  | 0.808 | 0.400             | 0.265  | 21      | 1            | -2.690                   | -0.937                   |
| AF2_IFD2_79  | 0.855 | 0.400             | 0.153  | 27      | 26           | -2.258                   | -2.669                   |
| AF2_IFD2_70  | 0.864 | 0.500             | 0.149  | 30      | 13           | -2.815                   | -1.221                   |
| AF2_IFD2_98  | 0.841 | 0.313             | 0.216  | 31      | 3            | -2.675                   | -1.284                   |



**Table S2. Oligonucleotides for molecular cloning of OR5K1.**

| Gene  | Oligo-nucleotide | Restriction Site | TM (°C) |    | Sequence 5' → 3'                                                                 |
|-------|------------------|------------------|---------|----|----------------------------------------------------------------------------------|
| OR5K1 | al-359           | EcoRI            | 58      | fw | CTGT <i>GAATTC</i> <b>ATG</b> GCT GAA GAA AAT CAT ACC ATG AAA<br>AAT GAG TTT ATC |
|       | al-360           | NotI             | 59      | rv | CTGC <i>GCGGCCGC</i> <b>GTA</b> ATT TCA CAT GGA AGT TTT TGC<br>TGC ATT TAA ATC   |

TM = melting temperature, fw = forward, rv = reverse. *Italic letters highlight the restriction sites.*  
Start and Stop codons are printed in bold.

**Table S3. Vector internal oligonucleotides.**

| Vector  | Oligonucleotide | TM (°C) |    | Sequence 5' → 3'                   |
|---------|-----------------|---------|----|------------------------------------|
| pFN210A | 520             | 60      | fw | GTG GAC ATC GGC CCG GGT C          |
|         | 550             | 52      | rv | CAC AAA TAA AGC ATT TTT TTC ACT GC |

TM = melting temperature, fw = forward, rv = reverse

**Table S4. Oligonucleotides for Homo sapiens OR5K1 site directed mutagenesis.**

| Gene        | Oligonucleotide | TM (°C) |    | Sequence 5' → 3'                        |
|-------------|-----------------|---------|----|-----------------------------------------|
| OR5K1 L104A | pm-275          | 57      | fw | <i>GTACAGTTTTATTTTGCTTGCACTGTGG</i>     |
|             | pm-276          | 57      | rv | <i>GTTTCCACAGTGCAAGCAAAATAAACTG</i>     |
| OR5K1 L255A | pm-281          | 58      | fw | <i>CATTATTCTATGGATCTGCTTTCTTCATGTAC</i> |
|             | pm-282          | 58      | rv | <i>GTACATGAAGAAAGCAGATCCATAGAATAATG</i> |

TM = melting temperature, fw = forward, rv = reverse

**Table S5. NCBI reference sequences of olfactory receptor genes investigated.**

| Gene        |                               |                         | NCBI Reference Sequence |
|-------------|-------------------------------|-------------------------|-------------------------|
| Description | Species                       | Common Species Name     | (Accession-number)      |
| OR5K1       | <i>Acinonyx jubatus</i>       | Cheetah                 | XP_014936391.1          |
| OR5K1       | <i>Ailuropoda melanoleuca</i> | Giant panda             | XP_011231001.2          |
| OR5K1       | <i>Aotus nancymaae</i>        | Nancy Ma's night monkey | XP_012332612.1          |
| OR5K1       | <i>Bos taurus</i>             | Cattle                  | NP_001377368.1          |
| OR5K1       | <i>Camelus dromedarius</i>    | Dromedary               | XP_010976859.1          |
| OR5K1       | <i>Camelus ferus</i>          | Wild Bactrian camel     | XP_006181138.2          |
| OR5K1       | <i>Canis lupus dingo</i>      | Australian dingo        | XP_025272970.1          |
| OR5K1       | <i>Canis lupus familiaris</i> | Domestic dog            | NP_001376061.1          |
| OR5K1       | <i>Carlito syrichta</i>       | Philippine tarsier      | XP_008064628.1          |
| OR5K1       | <i>Cervus canadensis</i>      | Elk                     | XP_043304847.1          |
| OR5K1       | <i>Cervus elaphus</i>         | Red deer                | XP_043748867.1          |

|            |                                 |                               |                |
|------------|---------------------------------|-------------------------------|----------------|
| OR5K1      | <i>Chlorocebus sabaeus</i>      | Green monkey                  | XP_007984292.2 |
| OR5K1-like | <i>Chrysochloris asiatica</i>   | Cape golden mole              | XP_006868660.1 |
| OR5K1      | <i>Felis catus</i>              | Domestic cat                  | XP_003991608.3 |
| OR5K1      | <i>Gorilla gorilla gorilla</i>  | Western lowland gorilla       | XP_004036007.1 |
| OR5K1      | <i>Homo sapiens</i>             | Human                         | NP_001004736.2 |
| OR5K2      | <i>Homo sapiens</i>             | Human                         | NP_001004737.1 |
| OR5K3      | <i>Homo sapiens</i>             | Human                         | NP_001005516.1 |
| OR5K4      | <i>Homo sapiens</i>             | Human                         | NP_001005517.1 |
| OR5K1      | <i>Lemur catta</i>              | Ring-tailed lemur             | XP_045396378.1 |
| OR5K1      | <i>Leopardus geoffroyi</i>      | Geoffroy's cat                | XP_045293055.1 |
| OR5K1      | <i>Lontra canadensis</i>        | North American river otter    | XP_032708517.1 |
| OR5K1      | <i>Loxodonta africana</i>       | African bush elephant         | XP_003418985.1 |
| OR5K1      | <i>Macaca fascicularis</i>      | Crab-eating macaque           | XP_045241289.1 |
| OR5K1      | <i>Macaca mulatta</i>           | Rhesus macaque                | NP_001180719.3 |
| OR5K1      | <i>Macaca nemestrina</i>        | Southern pig-tailed macaque   | XP_011732248.1 |
| OR5K1      | <i>Manis javanica</i>           | Sunda pangolin                | XP_036864239.1 |
| OR5K1      | <i>Manis pentadactyla</i>       | Chinese pangolin              | XP_036772454.1 |
| OR5K1      | <i>Marmota monax</i>            | Groundhog                     | XP_046311290.1 |
| OR5K1      | <i>Meles meles</i>              | European badger               | XP_045859641.1 |
| OR5K1      | <i>Microtus ochrogaster</i>     | Prairie vole                  | XP_005344986.1 |
| OR5K1      | <i>Microtus oregon</i>          | Stoat                         | XP_041528659.1 |
| Olfr172    | <i>Mus musculus</i>             | Mouse                         | NP_667212.2    |
| Olfr173    | <i>Mus musculus</i>             | Mouse                         | NP_667211.2    |
| OR5K1      | <i>Mustela erminea</i>          | Ermine                        | XP_032200493.1 |
| OR5K1      | <i>Mustela putoriusfuro</i>     | Ferret                        | XP_004772048.1 |
| OR5K1      | <i>Neogale vison</i>            | American mink                 | XP_044110727.1 |
| OR5K1      | <i>Nomascus leucogenys</i>      | Northern white-cheeked gibbon | XP_003261757.2 |
| OR5K1      | <i>Ovis aries</i>               | Domestic sheep                | XP_004002914.1 |
| OR5K1      | <i>Pan paniscus</i>             | Bonobo                        | XP_003821943.1 |
| OR5K1      | <i>Panthera tigris</i>          | Tiger                         | XP_007096003.2 |
| OR5K1      | <i>Pan troglodytes</i>          | Common chimpanzee             | XP_526253.2    |
| OR5K1      | <i>Papio anubis</i>             | Olive baboon                  | XP_031518815.1 |
| OR5K1      | <i>Peromyscus leucopus</i>      | White-footed mouse            | XP_028723391.1 |
| OR5K1      | <i>Pongo abelii</i>             | Sumatran orangutan            | XP_002813420.2 |
| OR5K1      | <i>Prionailurus bengalensis</i> | Leopard cat                   | XP_043451993.1 |
| OR5K1      | <i>Puma concolor</i>            | Cougar                        | XP_025769507.1 |
| OR5K1      | <i>Rhinopithecus roxellana</i>  | Golden snub-nosed monkey      | XP_010352038.2 |
| OR5K1      | <i>Sapajus apella</i>           | Tufted capuchin               | XP_032154801.1 |
| OR5K1      | <i>Theropithecus gelada</i>     | Gelada                        | XP_025233483.1 |
| OR5K1      | <i>Trachypithecus francoisi</i> | François' langur              | XP_033067425.1 |
| OR5K1      | <i>Urocitellus parryii</i>      | Arctic ground squirrel        | XP_026258216.1 |
| OR5K1      | <i>Ursus americanus</i>         | American black bear           | XP_045641565.1 |
| OR5K1      | <i>Ursus maritimus</i>          | Polar bear                    | XP_008700260.1 |
| OR5K1      | <i>Vicugna pacos</i>            | Alpaca                        | XP_006208125.1 |
| OR5K1      | <i>Vulpes vulpes</i>            | Redfox                        | XP_025846410.1 |
